# Supplementary material for: Syntaxin-1A modulates vesicle fusion in mammalian neurons via juxtamembrane domain dependent palmitoylation of its transmembrane domain
Source: eLife. 2022 May 31;11:e78182. doi: 10.7554/eLife.78182 (PMC9183232; doi:10.7554/eLife.78182)
Supplement: Figure 1—source data 1. [file elife-78182-fig1-data1.xlsx]

## Sheet: Fig 1B
Table 1: Quantification of the neurotransmitter release parameters of STX1-null neurons lentivirally transduced with STX1AWT or with STX1A JMD elongation mutants
Figure	Parameter measured	Statistical test	Genotype (STX1A)	Number of independent cultures	Number of observations	Parametric distribution 'Kolmogorov - Smirnov test'	Mean	SEM	Minimum	25% Percentile	Median	75% Percentile	Maximum	Mean ranks	Adjusted p-value (vs WT)
1B	EPSC Amplitude (nA)	Kruskal-Wallis; Dunn's post-hoc	WT	3	42	No	5.44	0.5023	0.2809	3.336	4.452	7.521	13.66	22.93
			GSG259	3	36	No	0.04738	0.01065	0	0	0.0285	0.07287	0.2106	95.56	<0.0001
			GSG265	3	43	No	0.5437	0.1894	0	0.05168	0.1491	0.4711	7.435	69.26	<0.0001

## Sheet: Fig 1C
Table 1: Quantification of the neurotransmitter release parameters of STX1-null neurons lentivirally transduced with STX1AWT or with STX1A JMD elongation mutants
Figure	Parameter measured	Statistical test	Genotype (STX1A)	Number of independent cultures	Number of observations	Parametric distribution 'Kolmogorov - Smirnov test'	Mean	SEM	Minimum	25% Percentile	Median	75% Percentile	Maximum	Mean ranks	Adjusted p-value (vs WT)
1C	EPSC Charge (pC)	Kruskal-Wallis; Dunn's post-hoc	WT	3	42	Yes	43.19	4.389	0	22.2	36.76	55.37	129.7	84.25
			GSG259	3	36	No	0.7496	0.1876	0	0	0.05584	1.151	4.146	26.35	<0.0001
			GSG265	3	43	No	41.41	9.135	0	2.224	17.76	58.5	250.2	67.3	0.0756

## Sheet: Fig 1D
Table 1: Quantification of the neurotransmitter release parameters of STX1-null neurons lentivirally transduced with STX1AWT or with STX1A JMD elongation mutants
Figure	Parameter measured	Statistical test	Genotype (STX1A)	Number of independent cultures	Number of observations	Parametric distribution 'Kolmogorov - Smirnov test'	Mean	SEM	Minimum	25% Percentile	Median	75% Percentile	Maximum	Mean ranks	Adjusted p-value (vs WT)
1D	EPSC rise time (20% - 80%; ms)	Mann-Whitney	WT	3	42	No	1.03	0.07117	0.1378	0.722	0.9255	1.262	2.321	26.07
			GSG265	3	27	No	2.062	0.2506	0.0735	1.305	2.015	2.339	7.042	48.89	<0.0001

## Sheet: Fig 1E
Table 1: Quantification of the neurotransmitter release parameters of STX1-null neurons lentivirally transduced with STX1AWT or with STX1A JMD elongation mutants
Figure	Parameter measured	Statistical test	Genotype (STX1A)	Number of independent cultures	Number of observations	Parametric distribution 'Kolmogorov - Smirnov test'	Mean	SEM	Minimum	25% Percentile	Median	75% Percentile	Maximum	Mean ranks	Adjusted p-value (vs WT)
1E	EPSC decay time (80% - 20%; ms)	Mann-Whitney	WT	3	42	Yes	6.9	0.3566	1.246	5.424	6.639	8.178	14.56	24.57
			GSG265	3	32	No	88.03	19.24	1.83	12.62	29.32	149.5	488.9	54.47	<0.0001

## Sheet: Fig 1F
Table 1: Quantification of the neurotransmitter release parameters of STX1-null neurons lentivirally transduced with STX1AWT or with STX1A JMD elongation mutants
Figure	Parameter measured	Statistical test	Genotype (STX1A)	Number of independent cultures	Number of observations	Parametric distribution 'Kolmogorov - Smirnov test'	Mean	SEM	Minimum	25% Percentile	Median	75% Percentile	Maximum	Mean ranks	Adjusted p-value (vs WT)
1F	RRP Charge (nC)	Kruskal-Wallis; Dunn's post-hoc	WT	3	41	Yes	0.6383	0.06408	0.02756	0.2906	0.6511	0.8951	2.087	85.07
			GSG259	3	34	No	0.1621	0.02162	0	0.06471	0.136	0.2274	0.5016	37.9	<0.0001
			GSG265	3	41	No	0.2471	0.03627	0	0.08148	0.1957	0.3464	0.9409	49.01	<0.0001

## Sheet: Fig 1G
Table 1: Quantification of the neurotransmitter release parameters of STX1-null neurons lentivirally transduced with STX1AWT or with STX1A JMD elongation mutants
Figure	Parameter measured	Statistical test	Genotype (STX1A)	Number of independent cultures	Number of observations	Parametric distribution 'Kolmogorov - Smirnov test'	Mean	SEM	Minimum	25% Percentile	Median	75% Percentile	Maximum	Mean ranks	Adjusted p-value (vs WT)
1G	Pvr (%)	Kruskal-Wallis; Dunn's post-hoc	WT	3	41	No	6.295	0.7451	0.517	3.656	5.31	7.319	29.41	64.98
			GSG259	3	34	No	1.358	0.5534	0	0	0.18	1.118	15.76	27.3	<0.0001
			GSG265	3	41	Yes	9.986	1.216	0	4.693	9.147	17.27	26.1	73.74	0.6918

## Sheet: Fig 1H
Table 1: Quantification of the neurotransmitter release parameters of STX1-null neurons lentivirally transduced with STX1AWT or with STX1A JMD elongation mutants
Figure	Parameter measured	Statistical test	Genotype (STX1A)	Number of independent cultures	Number of observations	Parametric distribution 'Kolmogorov - Smirnov test'	Mean	SEM	Minimum	25% Percentile	Median	75% Percentile	Maximum	Mean ranks	Adjusted p-value (vs WT)
1H	mEPSC Frequency (Hz)	Kruskal-Wallis; Dunn's post-hoc	WT	3	41	Yes	4.673	0.657	0	1.393	3.617	7.27	15.42	38.82
			GSG259	3	34	Yes	7.361	1.05	0	2.501	5.02	12.08	21.42	51.27	0.3356
			GSG265	3	41	No	16.44	1.417	0.96	9.598	16.02	22.76	34.9	84.07	<0.0001
