# Supplementary material for: Syntaxin-1A modulates vesicle fusion in mammalian neurons via juxtamembrane domain dependent palmitoylation of its transmembrane domain
Source: eLife. 2022 May 31;11:e78182. doi: 10.7554/eLife.78182 (PMC9183232; doi:10.7554/eLife.78182)
Supplement: Figure 2—figure supplement 1—source data 1. [file elife-78182-fig2-figsupp1-data1.xlsx]

## Sheet: Figure 2 - supplement 1A
Table 3: Quantification of the neurotransmitter release parameters of STX1-null neurons lentivirally transduced with STX1AWT, with STX1A JMD charge reversal mutants, or with STX1A JMD double charge neutralization mutants
Figure	Parameter measured	Statistical test	Genotype (STX1A)	Number of independent cultures	Number of observations	Parametric distribution 'Kolmogorov - Smirnov test'	Mean	SEM	Minimum	25% Percentile	Median	75% Percentile	Maximum	Mean ranks	Adjusted p-value (vs WT)
Figure 2 -supplement 1A	EPSC Amplitude (nA)	Kruskal-Wallis; Dunn's post-hoc	WT	3	44	No	5.23	0.7501	0.2404	1.564	3.41	7.317	19.79	44
			A261R	3	41	No	4.258	0.6121	0	1.695	2.863	6.349	14.78	41	>0.9999
			R263E	3	46	No	2.718	0.4444	0	0.4756	1.5	4.285	10.14	46	0.0176
			K265E	3	41	No	3.488	0.515	0	1.097	2.402	5.309	13.32	41	0.9166

## Sheet: Figure 2 - supplement 1B
Table 3: Quantification of the neurotransmitter release parameters of STX1-null neurons lentivirally transduced with STX1AWT, with STX1A JMD charge reversal mutants, or with STX1A JMD double charge neutralization mutants
Figure	Parameter measured	Statistical test	Genotype (STX1A)	Number of independent cultures	Number of observations	Parametric distribution 'Kolmogorov - Smirnov test'	Mean	SEM	Minimum	25% Percentile	Median	75% Percentile	Maximum	Mean ranks	Adjusted p-value (vs WT)
Figure 2 -supplement 1B	mEPSC frequency (nA)	Kruskal-Wallis; Dunn's post-hoc	WT	3	39	No	5.63	0.8895	0	1.458	4.48	8.55	28.05	80.9
			A261R	3	39	No	6.015	0.8855	0	1.938	3.75	8.69	21.53	83.51	>0.9999
			R263E	3	39	No	4.477	0.7324	0	0	3.146	7.667	15.23	68.82	>0.9999
			K265E	3	38	No	5.265	0.7756	0	1.979	3.751	7.75	17.96	78.79	>0.9999

## Sheet: Figure 2 - supplement 1C
Table 3: Quantification of the neurotransmitter release parameters of STX1-null neurons lentivirally transduced with STX1AWT, with STX1A JMD charge reversal mutants, or with STX1A JMD double charge neutralization mutants
Figure	Parameter measured	Statistical test	Genotype (STX1A)	Number of independent cultures	Number of observations	Parametric distribution 'Kolmogorov - Smirnov test'	Mean	SEM	Minimum	25% Percentile	Median	75% Percentile	Maximum	Mean ranks	Adjusted p-value (vs WT)
Figure 2 -supplement 1C	RRP charge (nA)	Kruskal-Wallis; Dunn's post-hoc	WT	3	42	No	0.4121	0.05536	0.03654	0.167	0.2624	0.6355	1.671	98.79
			A261R	3	39	No	0.3874	0.06713	0.02063	0.1063	0.2925	0.5897	2.352	91.08	>0.9999
			R263E	3	40	No	0.1677	0.02843	0	0.041	0.1085	0.2528	0.7734	55.86	0.0002
			K265E	3	40	Yes	0.2431	0.03138	0	0.09661	0.1939	0.3288	0.9427	77.64	0.2403

## Sheet: Figure 2 - supplement 1D
Table 3: Quantification of the neurotransmitter release parameters of STX1-null neurons lentivirally transduced with STX1AWT, with STX1A JMD charge reversal mutants, or with STX1A JMD double charge neutralization mutants
Figure	Parameter measured	Statistical test	Genotype (STX1A)	Number of independent cultures	Number of observations	Parametric distribution 'Kolmogorov - Smirnov test'	Mean	SEM	Minimum	25% Percentile	Median	75% Percentile	Maximum	Mean ranks	Adjusted p-value (vs WT)
Figure 2 -supplement 1D	Pvr (%)	Kruskal-Wallis; Dunn's post-hoc	WT	3	42	No	7.838	0.9517	0.7624	3.868	6.951	10.27	31.58	70.45
			A261R	3	36	Yes	7.964	0.8675	0.6272	3.806	7.382	10.09	22.92	73.92	>0.9999
			R263E	3	33	Yes	9.366	1.443	0	2.288	7.64	12.83	39.74	77.05	>0.9999
			K265E	3	37	Yes	8.174	0.8122	0	4.672	6.959	10.92	18.49	77.39	>0.9999

## Sheet: Figure 2 - supplement 2A
Table 3: Quantification of the neurotransmitter release parameters of STX1-null neurons lentivirally transduced with STX1AWT, with STX1A JMD charge reversal mutants, or with STX1A JMD double charge neutralization mutants
Figure	Parameter measured	Statistical test	Genotype (STX1A)	Number of independent cultures	Number of observations	Parametric distribution 'Kolmogorov - Smirnov test'	Mean	SEM	Minimum	25% Percentile	Median	75% Percentile	Maximum	Mean ranks	Adjusted p-value (vs WT)
Figure 2 -supplement 2A	EPSC Amplitude (nA)	Kruskal-Wallis; Dunn's post-hoc	WT	3	24	No	3.755	0.7793	0.05542	0.2817	2.838	6.276	14.29	67.71
			RR_AA	3	28	No	2.591	0.6979	0	0.1339	0.8293	3.39	11.97	55.95	0.8603
			KK_AA	3	26	No	1.273	0.456	0	0	0.4053	1.178	9.957	42.38	0.0118
			4RKA	3	22	No	0.5567	0.244	0	0	0.1207	0.3561	4.821	34.39	0.0006

## Sheet: Figure 2 - supplement 2B
Table 3: Quantification of the neurotransmitter release parameters of STX1-null neurons lentivirally transduced with STX1AWT, with STX1A JMD charge reversal mutants, or with STX1A JMD double charge neutralization mutants
Figure	Parameter measured	Statistical test	Genotype (STX1A)	Number of independent cultures	Number of observations	Parametric distribution 'Kolmogorov - Smirnov test'	Mean	SEM	Minimum	25% Percentile	Median	75% Percentile	Maximum	Mean ranks	Adjusted p-value (vs WT)
Figure 2 -supplement 2B	mEPSC frequency (nA)	Kruskal-Wallis; Dunn's post-hoc	WT	3	23	No	4.59	1.106	0	0.69	2.46	7.79	19.04	61.39
			RR_AA	3	25	No	4.16	1.091	0	0	2.54	6.06	18.88	54.26	>0.9999
			KK_AA	3	25	No	0.3064	0.09673	0	0	0	0.585	1.67	27.9	<0.0001
			4RKA	3	19	No	1.006	0.274	0	0	0.75	1.23	4.23	42.74	0.1323

## Sheet: Figure 2 - supplement 2C
Table 3: Quantification of the neurotransmitter release parameters of STX1-null neurons lentivirally transduced with STX1AWT, with STX1A JMD charge reversal mutants, or with STX1A JMD double charge neutralization mutants
Figure	Parameter measured	Statistical test	Genotype (STX1A)	Number of independent cultures	Number of observations	Parametric distribution 'Kolmogorov - Smirnov test'	Mean	SEM	Minimum	25% Percentile	Median	75% Percentile	Maximum	Mean ranks	Adjusted p-value (vs WT)
Figure 2 -supplement 2C	RRP charge (nA)	Kruskal-Wallis; Dunn's post-hoc	WT	3	23	Yes	0.3921	0.07949	0	0.06579	0.2077	0.6697	1.414	63.65
			RR_AA	3	26	Yes	0.2278	0.06584	0	0.0183	0.07736	0.2952	1.475	48.19	0.3125
			KK_AA	3	25	No	0.1471	0.03496	0	0.005978	0.07637	0.2469	0.6357	44	0.0866
			4RKA	3	22	No	0.09353	0.02284	0	0	0.07533	0.1381	0.356	38.14	0.0125

## Sheet: Figure 2 - supplement 2D
Table 3: Quantification of the neurotransmitter release parameters of STX1-null neurons lentivirally transduced with STX1AWT, with STX1A JMD charge reversal mutants, or with STX1A JMD double charge neutralization mutants
Figure	Parameter measured	Statistical test	Genotype (STX1A)	Number of independent cultures	Number of observations	Parametric distribution 'Kolmogorov - Smirnov test'	Mean	SEM	Minimum	25% Percentile	Median	75% Percentile	Maximum	Mean ranks	Adjusted p-value (vs WT)
Figure 2 -supplement 2D	Pvr (%)	Kruskal-Wallis; Dunn's post-hoc	WT	3	21	Yes	5.729	0.8763	0.3547	2.97	5.615	7.249	16.54	39.19
			RR_AA	3	23	Yes	9.176	1.167	0	5.491	8.84	12.86	19.01	50.83	0.5084
			KK_AA	3	18	No	5.87	1.591	0	2.214	4.064	5.942	26.48	34	>0.9999
			4RKA	3	15	No	4.22	1.56	0	0.5966	2.396	7.145	23.16	26.6	0.5751
