# Supplementary material for: Syntaxin-1A modulates vesicle fusion in mammalian neurons via juxtamembrane domain dependent palmitoylation of its transmembrane domain
Source: eLife. 2022 May 31;11:e78182. doi: 10.7554/eLife.78182 (PMC9183232; doi:10.7554/eLife.78182)
Supplement: Figure 2—source data 1. [file elife-78182-fig2-data1.xlsx]

## Sheet: Fig 2B
Table 2: Quantification of the neurotransmitter release parameters of STX1-null neurons lentivirally transduced with STX1AWT or with STX1A JMD charge reversal mutants
Figure	Parameter measured	Statistical test	Genotype (STX1A)	Number of independent cultures	Number of observations	Parametric distribution 'Kolmogorov - Smirnov test'	Mean	SEM	Minimum	25% Percentile	Median	75% Percentile	Maximum	Mean ranks	Adjusted p-value (vs WT)
2B	EPSC Amplitude (nA)	Kruskal-Wallis; Dunn's post-hoc	WT	3	39	Yes	4.781	0.6267	0	1.55	3.764	7.63	15.74	108.2
			K256E	3	39	No	4.051	0.5836	0	1.276	2.692	5.637	13.91	95.03	>0.9999
			K260E	3	40	No	3.115	0.4437	0	0.9938	2.355	4.173	12.29	82.7	0.4332
			R262E	3	34	No	3.552	0.4854	0.6467	1.131	2.798	4.451	12.04	91.91	>0.9999
			K264E	3	42	No	4.471	0.5129	0	1.85	3.541	5.998	13.18	108.5	>0.9999

## Sheet: Fig 2C
Table 2: Quantification of the neurotransmitter release parameters of STX1-null neurons lentivirally transduced with STX1AWT or with STX1A JMD charge reversal mutants
Figure	Parameter measured	Statistical test	Genotype (STX1A)	Number of independent cultures	Number of observations	Parametric distribution 'Kolmogorov - Smirnov test'	Mean	SEM	Minimum	25% Percentile	Median	75% Percentile	Maximum	Mean ranks	Adjusted p-value (vs WT)
2C	EPSC decay time (80% - 20%; ms)	Kruskal-Wallis; Dunn's post-hoc	WT	3	33	Yes	6.861	0.344	4.24	5.087	6.446	8.468	11.72	89.52
			K256E	3	35	Yes	6.288	0.3185	3.239	4.803	5.943	7.482	10.62	75.23	>0.9999
			K260E	3	35	Yes	6.115	0.2558	3.076	5.059	6.129	7.253	9.62	73.86	>0.9999
			R262E	3	34	No	8.345	0.5147	4.143	6.415	8.136	9.749	19.3	116.7	0.2971
			K264E	3	40	Yes	6.993	0.3605	3.178	5.382	6.429	8.267	14.56	90.3	>0.9999

## Sheet: Fig 2D
Table 2: Quantification of the neurotransmitter release parameters of STX1-null neurons lentivirally transduced with STX1AWT or with STX1A JMD charge reversal mutants
Figure	Parameter measured	Statistical test	Genotype (STX1A)	Number of independent cultures	Number of observations	Parametric distribution 'Kolmogorov - Smirnov test'	Mean	SEM	Minimum	25% Percentile	Median	75% Percentile	Maximum	Mean ranks	Adjusted p-value (vs WT)
2D	RRP Charge (nC)	Kruskal-Wallis; Dunn's post-hoc	WT	3	38	No	0.4335	0.05918	0.003697	0.1479	0.3045	0.6201	1.473	108.2
			K256E	3	36	No	0.2171	0.03878	0.01672	0.05985	0.1431	0.2834	1.102	69.75	0.0127
			K260E	3	34	No	0.2413	0.04722	0	0.06961	0.1685	0.2981	1.294	73.6	0.0428
			R262E	3	34	No	0.3322	0.0551	0.04393	0.1355	0.2127	0.3947	1.36	94.53	>0.9999
			K264E	3	35	No	0.3564	0.05284	0	0.1273	0.2844	0.5404	1.181	97.59	>0.9999

## Sheet: Fig 2E
Table 2: Quantification of the neurotransmitter release parameters of STX1-null neurons lentivirally transduced with STX1AWT or with STX1A JMD charge reversal mutants
Figure	Parameter measured	Statistical test	Genotype (STX1A)	Number of independent cultures	Number of observations	Parametric distribution 'Kolmogorov - Smirnov test'	Mean	SEM	Minimum	25% Percentile	Median	75% Percentile	Maximum	Mean ranks	Adjusted p-value (vs WT)
2E	Pvr (%)	Kruskal-Wallis; Dunn's post-hoc	WT	3	37	No	9.446	1.463	0	4.42	7.544	11.19	45.15	74.97
			K256E	3	36	No	13.22	1.652	1.614	5.932	9.968	19.48	36.61	96.22	0.6994
			K260E	3	34	No	12.91	1.957	0	3.967	9.346	17.98	40.44	91.18	>0.9999
			R262E	3	34	No	11.14	1.336	2.22	5.274	8.646	15.84	38.97	89.74	>0.9999
			K264E	3	32	No	10.28	1.436	0.8969	4.784	8.984	11.27	33.6	83.19	>0.9999

## Sheet: Fig 2F
Table 2: Quantification of the neurotransmitter release parameters of STX1-null neurons lentivirally transduced with STX1AWT or with STX1A JMD charge reversal mutants
Figure	Parameter measured	Statistical test	Genotype (STX1A)	Number of independent cultures	Number of observations	Parametric distribution 'Kolmogorov - Smirnov test'	Mean	SEM	Minimum	25% Percentile	Median	75% Percentile	Maximum	Mean ranks	Adjusted p-value (vs WT)
2F	mEPSC frequency (Hz)	Kruskal-Wallis; Dunn's post-hoc	WT	3	34	No	5.639	0.9695	0	1.033	4.442	8.401	22.49	103.1
			K256E	3	37	No	7.205	1.032	0	2.575	5.021	11.79	26.19	118.9	>0.9999
			K260E	3	39	No	1.02	0.1717	0	0.17	0.8333	1.438	4.47	46.67	<0.0001
			R262E	3	34	No	2.703	0.5111	0	0.7344	1.714	3.589	14.08	77.88	0.4559
			K264E	3	36	No	5.687	0.9833	0	1.953	3.151	8.058	30.88	108.8	>0.9999

## Sheet: Fig 2G
Table 2: Quantification of the neurotransmitter release parameters of STX1-null neurons lentivirally transduced with STX1AWT or with STX1A JMD charge reversal mutants
Figure	Parameter measured	Genotype (STX1A)	Number of independent cultures	Number of observations	Mean	SEM
2G	EPSC amplitude (norm to WT)	WT	6	83	100	9.78
		K256E	3	39	82.58	11.5
		K260E	3	40	64.39	8.803
		R262E	3	34	73.79	10.16
		R263E	3	46	50.95	8.258
		K264E	3	42	93.81	10.89
		K265E	3	41	64.82	9.027

## Sheet: Fig 2H
Table 2: Quantification of the neurotransmitter release parameters of STX1-null neurons lentivirally transduced with STX1AWT or with STX1A JMD charge reversal mutants
Figure	Parameter measured	Genotype (STX1A)	Number of independent cultures	Number of observations	Mean	SEM
2H	RRP charge (norm to WT)	WT	6	80	99.99	9.291
		K256E	3	36	51.57	9.528
		K260E	3	34	56.64	11.22
		R262E	3	34	77.41	12.7
		R263E	3	40	40.52	6.68
		K264E	3	35	83.88	13.04
		K265E	3	40	60.35	8.181

## Sheet: Fig 2I
Table 2: Quantification of the neurotransmitter release parameters of STX1-null neurons lentivirally transduced with STX1AWT or with STX1A JMD charge reversal mutants
Figure	Parameter measured	Genotype (STX1A)	Number of independent cultures	Number of observations	Mean	SEM
2I	Pvr (norm to WT)	WT	6	79	99.99	9.266
		K256E	3	36	139.8	18.59
		K260E	3	33	135	22.85
		R262E	3	34	126.7	17.53
		R263E	3	33	117.9	17.68
		K264E	3	33	145	30.13
		K265E	3	37	104.9	10.65

## Sheet: Fig 2J
Table 2: Quantification of the neurotransmitter release parameters of STX1-null neurons lentivirally transduced with STX1AWT or with STX1A JMD charge reversal mutants
Figure	Parameter measured	Genotype (STX1A)	Number of independent cultures	Number of observations	Mean	SEM
2J	mEPSC frequency (norm to WT)	WT	6	73	81.83	10.52
		K256E	3	37	74.95	14.93
		K260E	3	39	12.88	3.438
		R262E	3	34	25.16	5.864
		R263E	3	39	86.59	15.08
		K264E	3	36	57	14.14
		K265E	3	38	100.5	16.34
