# Supplementary material for: Syntaxin-1A modulates vesicle fusion in mammalian neurons via juxtamembrane domain dependent palmitoylation of its transmembrane domain
Source: eLife. 2022 May 31;11:e78182. doi: 10.7554/eLife.78182 (PMC9183232; doi:10.7554/eLife.78182)
Supplement: Figure 3—source data 1. [file elife-78182-fig3-data1.xlsx]

## Sheet: Fig 3C
Table 2: Quantification of the neurotransmitter release parameters of STX1-null neurons lentivirally transduced with STX1AWT or with STX1A JMD charge reversal mutants -3
Figure	Parameter measured	Genotype (STX1A)	Number of independent cultures	Mean	SEM
3C	WB weighed band intensity (neurons; norm. to WT)	K256E	4	124	17.37
		K260E	4	2.298	1.633
		R262E	4	33.59	14.99
		R263E	4	12.89	1.121
		K264E	4	83.42	6.142
		K265E	4	10.45	2.138

## Sheet: Fig 3F
Table 2: Quantification of the neurotransmitter release parameters of STX1-null neurons lentivirally transduced with STX1AWT or with STX1A JMD charge reversal mutants -3
Figure	Parameter measured	Genotype (STX1A)	Number of independent cultures	Mean	SEM
3F	WB weighed band intensity (HEK Cells; norm. to neuronal WT)	WT	4	16.91	5.313
		K256E	4	10.62	3.332
		K260E	4	8.642	3.413
		R262E	4	3.173	1.932
		R263E	4	5.208	3.253
		K264E	4	4.371	2.484
		K265E	4	6.707	4.917

## Sheet: Fig 3G
Table 4: Quantification of the neurotransmitter release parameters of STX1-null neurons lentivirally transduced with STX1AWT or with STX1A JMD charge reversal mutants -3
Figure	Genotype (STX1A)	Parameter measured (x-axis)	Number of independent cultures	Value (x-axis)	Parameter measured (y-axis)	Number of independent cultures	Number of observations	Mean	SEM
3G	WT	WB band distribution	4	6	EPSC amplitude (norm to WT)	6	83	100	9.78
	K256E		4	5		3	39	82.58	11.5
	K260E		4	1		3	40	64.39	8.803
	R262E		4	2		3	34	73.79	10.16
	R263E		4	3		3	46	50.95	8.258
	K264E		4	4		3	42	93.81	10.89
	K265E		4	3		3	41	64.82	9.027

## Sheet: Fig 3H
Table 4: Quantification of the neurotransmitter release parameters of STX1-null neurons lentivirally transduced with STX1AWT or with STX1A JMD charge reversal mutants -3
Figure	Genotype (STX1A)	Parameter measured (x-axis)	Number of independent cultures	Value (x-axis)	Parameter measured (y-axis)	Number of independent cultures	Number of observations	Mean	SEM
3H	WT	WB band distribution	4	6	RRP charge (norm to WT)	6	80	99.99	9.291
	K256E		4	5		3	36	51.57	9.528
	K260E		4	1		3	34	56.64	11.22
	R262E		4	2		3	34	77.41	12.7
	R263E		4	3		3	40	40.52	6.68
	K264E		4	4		3	35	83.88	13.04
	K265E		4	3		3	40	60.35	8.181

## Sheet: Fig 3I
Table 4: Quantification of the neurotransmitter release parameters of STX1-null neurons lentivirally transduced with STX1AWT or with STX1A JMD charge reversal mutants -3
Figure	Genotype (STX1A)	Parameter measured (x-axis)	Number of independent cultures	Value (x-axis)	Parameter measured (y-axis)	Number of independent cultures	Number of observations	Mean	SEM
3I	WT	WB band distribution	4	6	Pvr (norm to WT)	6	79	99.99	9.266
	K256E		4	5		3	36	139.8	18.59
	K260E		4	1		3	33	135	22.85
	R262E		4	2		3	34	126.7	17.53
	R263E		4	3		3	33	117.9	17.68
	K264E		4	4		3	33	145	30.13
	K265E		4	3		3	37	104.9	10.65

## Sheet: Fig 3J
Table 4: Quantification of the neurotransmitter release parameters of STX1-null neurons lentivirally transduced with STX1AWT or with STX1A JMD charge reversal mutants -3
Figure	Genotype (STX1A)	Parameter measured (x-axis)	Number of independent cultures	Value (x-axis)	Parameter measured (y-axis)	Number of independent cultures	Number of observations	Mean	SEM
3J	WT	WB band distribution	4	6	mEPSC frequency (norm to WT)	6	73	81.83	10.52
	K256E		4	5		3	37	74.95	14.93
	K260E		4	1		3	39	12.88	3.438
	R262E		4	2		3	34	25.16	5.864
	R263E		4	3		3	39	86.59	15.08
	K264E		4	4		3	36	57	14.14
	K265E		4	3		3	38	100.5	16.34
