# Supplementary material for: Syntaxin-1A modulates vesicle fusion in mammalian neurons via juxtamembrane domain dependent palmitoylation of its transmembrane domain
Source: eLife. 2022 May 31;11:e78182. doi: 10.7554/eLife.78182 (PMC9183232; doi:10.7554/eLife.78182)
Supplement: Figure 4—source data 1. [file elife-78182-fig4-data1.xlsx]

## Sheet: Fig 4D
Table 5: Quantification of the neurotransmitter release parameters of STX1-null neurons lentivirally transduced with STX1AWT or with STX1A palmitoylation mutans
Figure	Parameter measured	Statistical test	Genotype (STX1A)	Number of independent cultures	Number of observations	Parametric distribution 'Kolmogorov - Smirnov test'	Mean	SEM	Minimum	25% Percentile	Median	75% Percentile	Maximum	Mean ranks	Adjusted p-value (vs WT)
4D	EPSC Amplitude (nA)	Kruskal-Wallis; Dunn's post-hoc	WT	3	42	No	6.595	0.7493	0.2299	3.46	4.461	9.063	22.19	96.31
			C271V	3	41	Yes	5.16	0.5158	0.09828	2.511	4.638	7.011	14.38	85.98	>0.9999
			C272V	3	41	No	5.167	0.6193	0.0301	2.354	4.178	7.456	16.22	80.51	0.8344
			CVCV	3	44	Yes	4.581	0.4906	0.1702	1.56	4.05	7.167	12.03	75.57	0.2885

## Sheet: Fig 4E
Table 5: Quantification of the neurotransmitter release parameters of STX1-null neurons lentivirally transduced with STX1AWT or with STX1A palmitoylation mutans
Figure	Parameter measured	Statistical test	Genotype (STX1A)	Number of independent cultures	Number of observations	Parametric distribution 'Kolmogorov - Smirnov test'	Mean	SEM	Minimum	25% Percentile	Median	75% Percentile	Maximum	Mean ranks	Adjusted p-value (vs WT)
4E	EPSC decay time (80% - 20%; ms)	Kruskal-Wallis; Dunn's post-hoc	WT	3	42	Yes	7.354	0.342	3.654	5.738	7.022	8.598	13.59	102.7
			C271V	3	40	No	6.358	0.283	3.788	4.953	5.837	7.425	10.11	77.18	0.0964
			C272V	3	41	Yes	6.11	0.2346	3.637	5.28	5.848	6.886	10.78	73.95	0.0382
			CVCV	3	43	Yes	6.3	0.2275	3.923	5.422	5.992	7.224	10.31	79.7	0.1628

## Sheet: Fig 4F
Table 5: Quantification of the neurotransmitter release parameters of STX1-null neurons lentivirally transduced with STX1AWT or with STX1A palmitoylation mutans
Figure	Parameter measured	Statistical test	Genotype (STX1A)	Number of independent cultures	Number of observations	Parametric distribution 'Kolmogorov - Smirnov test'	Mean	SEM	Minimum	25% Percentile	Median	75% Percentile	Maximum	Mean ranks	Adjusted p-value (vs WT)
4F	RRP charge (nC)	Kruskal-Wallis; Dunn's post-hoc	WT	3	42	Yes	0.5941	0.06251	0	0.2405	0.5761	0.7942	1.717	84.17
			C271V	3	40	No	0.6559	0.08248	0.0257	0.2318	0.5348	0.8942	1.783	84.25	>0.9999
			C272V	3	40	No	0.5884	0.0753	0.04501	0.2861	0.3932	0.8279	1.994	78.45	>0.9999
			CVCV	3	41	No	0.5798	0.06678	0.08376	0.2778	0.4739	0.7677	2.091	81.05	>0.9999
						3

## Sheet: Fig 4G
Table 5: Quantification of the neurotransmitter release parameters of STX1-null neurons lentivirally transduced with STX1AWT or with STX1A palmitoylation mutans
Figure	Parameter measured	Statistical test	Genotype (STX1A)	Number of independent cultures	Number of observations	Parametric distribution 'Kolmogorov - Smirnov test'	Mean	SEM	Minimum	25% Percentile	Median	75% Percentile	Maximum	Mean ranks	Adjusted p-value (vs WT)
4G	Pvr (%)	Kruskal-Wallis; Dunn's post-hoc	WT	3	41	Yes	7.402	0.5066	3.073	4.938	6.758	9.695	15.79	110.4
			C271V	3	40	No	5.152	0.5308	1.304	3.227	4.138	6.505	21.09	75.35	<0.0001
			C272V	3	40	No	4.99	0.4835	0	3.152	4.448	6.171	15.83	74.13	0.0046
			CVCV	3	41	No	4.711	0.5641	0.074	2.258	4.001	5.678	18.43	65.76	0.003

## Sheet: Fig 4H
Table 5: Quantification of the neurotransmitter release parameters of STX1-null neurons lentivirally transduced with STX1AWT or with STX1A palmitoylation mutans
Figure	Parameter measured	Statistical test	Genotype (STX1A)	Number of independent cultures	Number of observations	Parametric distribution 'Kolmogorov - Smirnov test'	Mean	SEM	Minimum	25% Percentile	Median	75% Percentile	Maximum	Mean ranks	Adjusted p-value (vs WT)
4H	mEPSC frequency (Hz)	Kruskal-Wallis; Dunn's post-hoc	WT	3	40	No	5.344	0.7687	0	1.95	3.637	9.974	19.88	106
			C271V	3	40	No	3.392	0.7338	0	0.3675	1.769	4.893	21.71	83.19	<0.0001
			C272V	3	38	No	2.332	0.4681	0	0.2038	1.24	3.483	12.98	74.62	0.1451
			CVCV	3	39	No	1.29	0.476	0	0	0.19	1.521	17.9	51.29	0.0132

## Sheet: Fig 4I
Table 5: Quantification of the neurotransmitter release parameters of STX1-null neurons lentivirally transduced with STX1AWT or with STX1A palmitoylation mutans
Figure	Parameter measured	Stimulus number (x-axis)	Statistical test	Number of independent cultures	Number of observations	Mean	SEM	Number of observations	Mean	SEM	Adjusted p-value (vs WT)	Number of observations	Mean	SEM	Adjusted p-value (vs WT)	Number of observations	Mean	SEM	Adjusted p-value (vs WT)
					WT			C271V				C272V				CVCV
4I	EPSC(X) / EPSC(1)	1	Mixed effect analysis	3	33	1	0	31	1	0		31	1	0		34	1	0
		2	Followed by Tukey's post-hoc			0.905331	0.0218477		1.04252	0.0344791	0.2638		0.993065	0.0300309	0.6496		0.988282	0.0409163	0.6731
		3				0.808684	0.0246712		0.993671	0.0373784	0.0674		0.964971	0.0322574	0.1619		0.965506	0.0514504	0.1438
		4				0.742234	0.0257588		0.946867	0.0398762	0.0336		0.943117	0.0397381	0.0386		0.961311	0.054128	0.0156
		5				0.704186	0.0244691		0.920488	0.0400809	0.0214		0.918325	0.0406109	0.0234		0.949567	0.0532508	0.0048
		6				0.697292	0.031016		0.911265	0.0451089	0.0235		0.886286	0.0448177	0.0588		0.930326	0.0637781	0.0085
		7				0.661216	0.0289983		0.882562	0.0425876	0.0175		0.91624	0.045652	0.004		0.915144	0.0584599	0.0032
		8				0.659555	0.032031		0.898375	0.044139	0.0084		0.902793	0.0487655	0.0069		0.935771	0.0594433	0.001
		9				0.655539	0.0290387		0.859273	0.039813	0.0348		0.889949	0.0442959	0.0101		0.899301	0.0596969	0.0052
		10				0.656788	0.0293894		0.859856	0.0447484	0.0356		0.901868	0.048956	0.0063		0.910838	0.0591373	0.0032
		11				0.653319	0.0317816		0.876812	0.0472965	0.0161		0.889167	0.0490282	0.0095		0.919602	0.0650083	0.0017
		12				0.659179	0.0322987		0.860849	0.0417728	0.0375		0.903138	0.0514329	0.0067		0.938405	0.0674033	0.0009
		13				0.651074	0.0311803		0.863928	0.0440518	0.0246		0.918517	0.0511367	0.0022		0.935354	0.0633144	0.0007
		14				0.65315	0.035189		0.878795	0.0453903	0.0147		0.912304	0.0501983	0.0033		0.903683	0.0641602	0.0038
		15				0.653353	0.036945		0.873025	0.0456633	0.0187		0.911425	0.050792	0.0035		0.943763	0.0695151	0.0005
		16				0.636588	0.0331916		0.869217	0.0441039	0.0109		0.912533	0.0527345	0.0014		0.931612	0.0700918	0.0004
		17				0.652233	0.0345912		0.855535	0.0437686	0.0353		0.904969	0.048914	0.0045		0.938906	0.0700037	0.0006
		18				0.659024	0.0364862		0.844268	0.0432408	0.0668		0.899477	0.0540822	0.0078		0.957251	0.0725519	0.0003
		19				0.652641	0.0331046		0.848795	0.0447598	0.0458		0.908157	0.0496546	0.0039		0.95338	0.0731155	0.0003
		20				0.641268	0.0389932		0.852578	0.0448548	0.0261		0.883448	0.0545101	0.0072		0.934958	0.0686794	0.0004
		21				0.636967	0.0353538		0.859706	0.0462996	0.0166		0.917224	0.0551899	0.0012		0.933912	0.0682169	0.0003
		22				0.654326	0.0370219		0.872843	0.0470968	0.0196		0.900815	0.0526671	0.0059		0.93734	0.0724641	0.0007
		23				0.659557	0.0372398		0.857132	0.0461292	0.0435		0.8972	0.0545887	0.0088		0.924239	0.0740635	0.0019
		24				0.635513	0.035014		0.858695	0.0434688	0.0163		0.91004	0.0554796	0.0016		0.941225	0.0735758	0.0002
		25				0.647563	0.0373762		0.866572	0.0447526	0.0193		0.945823	0.0553022	0.0004		0.934961	0.0728119	0.0006
		26				0.647607	0.0388449		0.883567	0.0507164	0.0095		0.914909	0.0540102	0.0022		0.968988	0.078416	<0.0001
		27				0.646971	0.0411119		0.85463	0.0450182	0.03		0.909375	0.0567521	0.0028		0.951448	0.0741157	0.0002
		28				0.641179	0.0384434		0.874346	0.046138	0.0107		0.927955	0.0569519	0.0008		0.943038	0.0772448	0.0002
		29				0.645942	0.0374428		0.861181	0.0442779	0.0224		0.88817	0.0564315	0.0072		0.931334	0.0726122	0.0006
		30				0.642482	0.0389378		0.852883	0.0490698	0.027		0.924601	0.0574513	0.0011		0.945922	0.0768074	0.0002
		31				0.638591	0.0381103		0.866729	0.0488095	0.0132		0.913435	0.0578102	0.0015		0.938783	0.0792507	0.0003
		32				0.642617	0.0397289		0.867121	0.0441836	0.0154		0.910427	0.0561959	0.0022		0.959657	0.0754448	<0.0001
		33				0.641695	0.0383857		0.853081	0.0465009	0.026		0.900575	0.0548115	0.0033		0.960387	0.0767011	<0.0001
		34				0.647988	0.0362993		0.846548	0.0435765	0.042		0.910995	0.051987	0.0027		0.917166	0.0803245	0.0015
		35				0.63345	0.0398116		0.851365	0.0437872	0.0201		0.929977	0.0588206	0.0005		0.953921	0.078346	<0.0001
		36				0.643282	0.0382777		0.832283	0.0422479	0.0588		0.911448	0.0564921	0.0021		0.943968	0.0745975	0.0003
		37				0.625991	0.0394787		0.849798	0.0429746	0.0158		0.917798	0.0579387	0.0006		0.952922	0.081678	<0.0001
		38				0.631302	0.0386546		0.860755	0.044278	0.0125		0.896308	0.0558059	0.0025		0.924617	0.0751337	0.0004
		39				0.637905	0.0388836		0.845523	0.0425391	0.03		0.909686	0.0535007	0.0018		0.963843	0.0791088	<0.0001
		40				0.645397	0.0412848		0.851629	0.0433337	0.0317		0.908919	0.0579614	0.0027		0.965973	0.0819722	<0.0001
		41				0.627073	0.0397998		0.857857	0.0457382	0.0118		0.925716	0.0560546	0.0004		0.936011	0.0787209	0.0002
		42				0.641689	0.0390566		0.834011	0.0434778	0.0524		0.893829	0.058858	0.0046		0.95016	0.0782778	0.0002
		43				0.626705	0.0382455		0.847684	0.045143	0.0178		0.904016	0.0567333	0.0013		0.948441	0.0764193	<0.0001
		44				0.626641	0.0371577		0.826618	0.0425324	0.0399		0.895561	0.0593489	0.0021		0.939053	0.081932	0.0001
		45				0.628864	0.0392887		0.836043	0.041862	0.0305		0.900807	0.059256	0.0018		0.946453	0.0801237	<0.0001
		46				0.627879	0.038205		0.840863	0.0421666	0.0244		0.892296	0.0566537	0.0026		0.94862	0.0778637	<0.0001
		47				0.637307	0.0366148		0.844207	0.0433687	0.0309		0.903116	0.055724	0.0024		0.919135	0.0733273	0.0008
		48				0.619846	0.0381025		0.821438	0.0426678	0.0376		0.919247	0.0594707	0.0004		0.939655	0.0774764	<0.0001
		49				0.630996	0.0436693		0.844133	0.0437842	0.0243		0.902696	0.0583606	0.0018		0.935649	0.0780788	0.0002
		50				0.628178	0.0390409		0.825582	0.0407231	0.0438		0.895552	0.0613308	0.0022		0.952673	0.0827918	<0.0001
