# Supplementary material for: Syntaxin-1A modulates vesicle fusion in mammalian neurons via juxtamembrane domain dependent palmitoylation of its transmembrane domain
Source: eLife. 2022 May 31;11:e78182. doi: 10.7554/eLife.78182 (PMC9183232; doi:10.7554/eLife.78182)
Supplement: Figure 5—figure supplement 1—source data 1. [file elife-78182-fig5-figsupp1-data1.xlsx]

## Sheet: Figure 5 - supplement 1A
Table 7: Quantification of the neurotransmitter release parameters of STX1AK260E and STX1ACVCV neurons as normalized to the values recorded from STX1AWT neurons
Figure	Parameter measured	Statistical test	Genotype (STX1A)	Number of independent cultures	Number of observations	Parametric distribution 'Kolmogorov - Smirnov test'	Mean	SEM	Minimum	25% Percentile	Median	75% Percentile	Maximum	Mean ranks	Adjusted p-value (vs WT)
Figure 5 -supplement 1A	EPSC Amplitude (norm to WT)	Mann-Whitney	WT	10	132	No	1	0.06353	0	0.4318	0.8542	1.453	3.551	158.1
			K260E	10	139	No	0.685	0.06246	0	0.1407	0.4424	0.9475	3.979	115	<0.0001
		Mann-Whitney	WT	6	79	No	1	0.07589	0.04256	0.4697	0.9016	1.388	3.551	90.38
			CVCV	6	80	No	0.7652	0.07386	0.0352	0.283	0.6132	1.046	3.291	69.75	0.0046

## Sheet: Figure 5 - supplement 1B
Table 7: Quantification of the neurotransmitter release parameters of STX1AK260E and STX1ACVCV neurons as normalized to the values recorded from STX1AWT neurons
Figure	Parameter measured	Statistical test	Genotype (STX1A)	Number of independent cultures	Number of observations	Parametric distribution 'Kolmogorov - Smirnov test'	Mean	SEM	Minimum	25% Percentile	Median	75% Percentile	Maximum	Mean ranks	Adjusted p-value (vs WT)
Figure 5 -supplement 1B	mEPSC frequency (norm to WT)	Mann-Whitney	WT	10	119	No	1	0.09235	0	0.1775	0.6952	1.526	4.398	161.6
			K260E	10	128	No	0.2015	0.03367	0	0	0.05767	0.2256	2.835	89.08	<0.0001
		Mann-Whitney	WT	6	74	No	1	0.115	0	0.2636	0.6869	1.524	4.398	89.15
			CVCV	6	69	No	0.3189	0.05703	0	0	0.1185	0.4526	2.531	53.61	<0.0001

## Sheet: Figure 5 - supplement 1C
Table 7: Quantification of the neurotransmitter release parameters of STX1AK260E and STX1ACVCV neurons as normalized to the values recorded from STX1AWT neurons
Figure	Parameter measured	Statistical test	Genotype (STX1A)	Number of independent cultures	Number of observations	Parametric distribution 'Kolmogorov - Smirnov test'	Mean	SEM	Minimum	25% Percentile	Median	75% Percentile	Maximum	Mean ranks	Adjusted p-value (vs WT)
Figure 5 -supplement 1C	RRP charge (norm to WT)	Mann-Whitney	WT	10	127	No	1	0.08147	0	0.375	0.6746	1.433	4.673	145
			K260E	10	125	No	0.6338	0.06342	0	0.1859	0.4005	0.805	4.433	107.7	<0.0001
		Mann-Whitney	WT	6	79	No	1	0.08937	0	0.4467	0.7945	1.38	3.943	77.53
			CVCV	6	80	Yes	1.053	0.103	0.06733	0.4417	0.7803	1.395	4.504	78.49	0.8964

## Sheet: Figure 5 - supplement 1D
Table 7: Quantification of the neurotransmitter release parameters of STX1AK260E and STX1ACVCV neurons as normalized to the values recorded from STX1AWT neurons
Figure	Parameter measured	Statistical test	Genotype (STX1A)	Number of independent cultures	Number of observations	Parametric distribution 'Kolmogorov - Smirnov test'	Mean	SEM	Minimum	25% Percentile	Median	75% Percentile	Maximum	Mean ranks	Adjusted p-value (vs WT)
Figure 5 -supplement 1D	Pvr (norm to WT)	Mann-Whitney	WT	10	126	No	1	0.07745	0	0.4938	0.7281	1.346	5.132	123.2
			K260E	10	117	No	1.1	0.1225	0	0.4168	0.763	1.289	10.14	120.7	0.7806
		Mann-Whitney	WT	6	78	No	1	0.07254	0.1801	0.5813	0.8869	1.284	4.603	93.6
			CVCV	6	76	No	0.6495	0.05912	0.01113	0.2907	0.5112	0.8118	2.598	60.97	<0.0001
