# Supplementary material for: Syntaxin-1A modulates vesicle fusion in mammalian neurons via juxtamembrane domain dependent palmitoylation of its transmembrane domain
Source: eLife. 2022 May 31;11:e78182. doi: 10.7554/eLife.78182 (PMC9183232; doi:10.7554/eLife.78182)
Supplement: Figure 5—source data 1. [file elife-78182-fig5-data1.xlsx]

## Sheet: Fig 5B
Table 6: Quantification of the neurotransmitter release parameters of STX1-null neurons transduced either with STX1AWT, STX1AK260E, STX1ACVCV, or STX1AK260E+CVCV
Figure	Parameter measured	Statistical test	Genotype	Number of independent cultures	Number of observations	Parametric distribution 'Kolmogorov - Smirnov test'	Mean	SEM	Minimum	25% Percentile	Median	75% Percentile	Maximum	Mean ranks	Adjusted p-value (vs WT)
5B	∆F/F0 1 AP	Mann-Whitney	WT	3	35	No	0.1449	0.0734	0.01102	0.02386	0.03726	0.05218	2.306	43.94
			STX1-null	3	38	No	0.03226	0.003976	0.01048	0.01736	0.02529	0.03684	0.121	30.61	0.0069
	∆F/F0 2 AP	Mann-Whitney	WT	3	35	No	0.282	0.08484	0.02961	0.09267	0.1155	0.2119	2.621	45.23
			STX1-null	3	38	Yes	0.09719	0.01134	0.01964	0.04767	0.07884	0.1323	0.3794	29.42	0.0013
	∆F/F0 5 AP	Mann-Whitney	WT	3	35	No	0.5539	0.08406	0.0872	0.2735	0.4234	0.6457	2.757	46.04
			STX1-null	3	38	No	0.2922	0.03338	0.0631	0.1641	0.2542	0.343	1.124	28.67	0.0004
	∆F/F0 10 AP	Mann-Whitney	WT	3	35	No	0.8084	0.09195	0.171	0.4197	0.7476	1.029	2.98	45.69
			STX1-null	3	38	No	0.4808	0.05761	0.09222	0.2372	0.4257	0.6032	2.002	29	0.0006
	∆F/F0 20 AP	Mann-Whitney	WT	3	35	Yes	0.998	0.09935	0.2601	0.5128	0.9588	1.318	3.015	46.09
			STX1-null	3	38	No	0.6109	0.07959	0.1012	0.3015	0.5578	0.7742	2.722	28.63	0.0003

## Sheet: Fig 5C
Table 6: Quantification of the neurotransmitter release parameters of STX1-null neurons transduced either with STX1AWT, STX1AK260E, STX1ACVCV, or STX1AK260E+CVCV
Figure	Parameter measured	Statistical test	Genotype	Number of independent cultures	Number of observations	Parametric distribution 'Kolmogorov - Smirnov test'	Mean	SEM	Minimum	25% Percentile	Median	75% Percentile	Maximum	Mean ranks	Adjusted p-value (vs WT)
5B	∆F/F0 1 AP	Kruskal-Wallis Dunn's post-hoc	WT	3	38	No	0.06772	0.01014	0.00243	0.03194	0.04665	0.08682	0.2802	72.8
			K260E	3	43	No	0.0536	0.006068	0.003381	0.02803	0.04153	0.06766	0.1798	65.28	>0.9999
			CVCV	3	38	No	0.15	0.0541	0.00909	0.03986	0.05508	0.1255	1.851	83.57	>0.9999
	∆F/F0 2 AP	Kruskal-Wallis Dunn's post-hoc	WT	3	38	No	0.3313	0.07448	0.04362	0.1177	0.1741	0.3118	2.196	82.79
			K260E	3	43	No	0.174	0.02107	0.005875	0.08957	0.1261	0.2321	0.6894	64.09	0.2735
			CVCV	3	38	No	0.2714	0.05788	0.0199	0.1219	0.1872	0.2549	2.001	79.21	>0.9999
	∆F/F0 5 AP	Kruskal-Wallis Dunn's post-hoc	WT	3	38	Yes	0.6262	0.059	0.1279	0.4065	0.5364	0.8434	1.814	81.54
			K260E	3	43	No	0.4682	0.04546	0.04675	0.2731	0.3927	0.5643	1.512	60.41	0.143
			CVCV	3	38	No	0.6357	0.08043	0.06856	0.3605	0.509	0.8359	2.785	77.8	>0.9999
	∆F/F0 10 AP	Kruskal-Wallis Dunn's post-hoc	WT	3	38	No	1.026	0.1054	0.1863	0.6179	0.8352	1.365	2.584	80.88
			K260E	3	43	No	0.7398	0.06416	0.1033	0.4878	0.6351	0.9426	1.832	62.15	0.2711
			CVCV	3	38	Yes	0.9276	0.09428	0.151	0.4854	0.8058	1.319	2.82	75.95	>0.9999
	∆F/F0 20 AP	Kruskal-Wallis Dunn's post-hoc	WT	3	38	Yes	1.22	0.1171	0.2012	0.719	1.044	1.641	3.032	81.96
			K260E	3	43	No	0.9128	0.07642	0.1834	0.5483	0.8212	1.281	2.04	63.94	0.324
			CVCV	3	38	No	1.064	0.1087	0.2475	0.4797	0.9623	1.577	2.795	72	>0.9999

## Sheet: Fig 5D
Table 6: Quantification of the neurotransmitter release parameters of STX1-null neurons transduced either with STX1AWT, STX1AK260E, STX1ACVCV, or STX1AK260E+CVCV
Figure	Parameter measured	Statistical test	Genotype (STX1A)	Number of independent cultures	Number of observations	Parametric distribution 'Kolmogorov - Smirnov test'	Mean	SEM	Minimum	25% Percentile	Median	75% Percentile	Maximum	Mean ranks	Adjusted p-value (vs WT)
5D	EPSC Amplitude (nA)	Kruskal-Wallis; Dunn's post-hoc	WT	4	49	No	5.691	0.5855	0.2299	2.373	4.83	8.664	18.14	123.8
			K260E	4	54	No	4.497	0.7039	0	0.5265	2.844	5.648	20.33	93.67	0.0554
			CVCV	4	49	No	4.875	0.6202	0.316	1.462	3.652	8.016	21.46	110.5	>0.9999
			K260E +CVCV	4	51	No	3.919	0.8235	0.00875	0.5103	1.42	4.444	32	81.69	0.002

## Sheet: Fig 5E
Table 6: Quantification of the neurotransmitter release parameters of STX1-null neurons transduced either with STX1AWT, STX1AK260E, STX1ACVCV, or STX1AK260E+CVCV
Figure	Parameter measured	Statistical test	Genotype (STX1A)	Number of independent cultures	Number of observations	Parametric distribution 'Kolmogorov - Smirnov test'	Mean	SEM	Minimum	25% Percentile	Median	75% Percentile	Maximum	Mean ranks	Adjusted p-value (vs WT)
5E	EPSC decay time (80% - 20%; ms)	Kruskal-Wallis; Dunn's post-hoc	WT	4	49	No	7.068	0.3111	3.654	5.521	6.512	8.339	12.14	109
			K260E	4	50	Yes	6.456	0.2855	3.543	4.897	5.918	7.819	12.38	91.3	0.6984
			CVCV	4	48	No	6.766	0.2485	3.478	5.599	6.437	8.001	11.55	106	>0.9999
			K260E +CVCV	4	47	Yes	6.07	0.2256	3.404	5.032	5.812	6.909	10.23	83.4	0.1527

## Sheet: Fig 5F
Table 6: Quantification of the neurotransmitter release parameters of STX1-null neurons transduced either with STX1AWT, STX1AK260E, STX1ACVCV, or STX1AK260E+CVCV
Figure	Parameter measured	Statistical test	Genotype (STX1A)	Number of independent cultures	Number of observations	Parametric distribution 'Kolmogorov - Smirnov test'	Mean	SEM	Minimum	25% Percentile	Median	75% Percentile	Maximum	Mean ranks	Adjusted p-value (vs WT)
5F	RRP charge (nC)	Kruskal-Wallis; Dunn's post-hoc	WT	4	49	No	0.5546	0.07589	0	0.1948	0.413	0.631	2.394	106.8
			K260E	4	49	No	0.4499	0.07234	0	0.0973	0.2381	0.6514	2.501	88.9	0.6926
			CVCV	4	47	No	0.6256	0.07852	0.04866	0.2508	0.4739	0.8426	2.541	115.6	>0.9999
			K260E +CVCV	4	49	No	0.3849	0.0707	0.01437	0.07424	0.2407	0.4605	2.598	79.47	0.0969

## Sheet: Fig 5G
Table 6: Quantification of the neurotransmitter release parameters of STX1-null neurons transduced either with STX1AWT, STX1AK260E, STX1ACVCV, or STX1AK260E+CVCV
Figure	Parameter measured	Statistical test	Genotype (STX1A)	Number of independent cultures	Number of observations	Parametric distribution 'Kolmogorov - Smirnov test'	Mean	SEM	Minimum	25% Percentile	Median	75% Percentile	Maximum	Mean ranks	Adjusted p-value (vs WT)
5G	Pvr (%)	Kruskal-Wallis; Dunn's post-hoc	WT	4	48	No	7.564	0.9605	1.375	4.029	5.291	10.58	44.13	110
			K260E	4	41	No	6.607	0.694	0.392	3.143	6.097	9.174	21.76	103.9	>0.9999
			CVCV	4	47	Yes	5.197	0.5728	0.183	2.46	4.524	6.806	18.43	84.66	0.1225
			K260E +CVCV	4	48	No	4.391	0.5217	0	1.277	4.169	6.664	13.75	72.98	0.004

## Sheet: Fig 5H
Table 6: Quantification of the neurotransmitter release parameters of STX1-null neurons transduced either with STX1AWT, STX1AK260E, STX1ACVCV, or STX1AK260E+CVCV
Figure	Parameter measured	Statistical test	Genotype (STX1A)	Number of independent cultures	Number of observations	Parametric distribution 'Kolmogorov - Smirnov test'	Mean	SEM	Minimum	25% Percentile	Median	75% Percentile	Maximum	Mean ranks	Adjusted p-value (vs WT)
5H	mEPSC frequency (Hz)	Kruskal-Wallis; Dunn's post-hoc	WT	4	45	No	4.222	0.6938	0	0.78	2.65	5.525	18.98	123.6
			K260E	4	48	No	1.175	0.287	0	0	0.28	1.53	9.42	77.58	<0.0001
			CVCV	4	40	No	1.502	0.3051	0	0	0.47	2.81	8.75	88.51	0.0087
			K260E +CVCV	4	46	No	0.7541	0.1569	0	0	0.19	1.295	4.19	71.36	<0.0001

## Sheet: Fig 5I
Table 6: Quantification of the neurotransmitter release parameters of STX1-null neurons transduced either with STX1AWT, STX1AK260E, STX1ACVCV, or STX1AK260E+CVCV
Figure	Parameter measured	Stimulus number (x-axis)	Statistical test	Number of independent cultures	Number of observations	Mean	SEM	Number of observations	Mean	SEM	Adjusted p-value (vs WT)	Number of observations	Mean	SEM	Adjusted p-value (vs WT)	Number of observations	Mean	SEM	Adjusted p-value (vs WT)
					WT			K260E				CVCV				K260E + CVCV
5I	EPSC(X) / EPSC(1)	1	Mixed effect analysis	4	46	1	0	40	1	0		40	1	0		45	1	0
		2	Followed by Tukey's post-hoc			0.873916	0.0265182		0.985808	0.032298	0.7609		0.91741	0.0285553	0.9794		0.990998	0.0469217	0.7345
		3				0.755485	0.031677		0.924223	0.0383341	0.4509		0.910575	0.0408661	0.4989		1.01035	0.0592219	0.1146
		4				0.719526	0.0333953		0.913585	0.0355913	0.3238		0.890887	0.0430477	0.4091		0.961344	0.0576772	0.1474
		5				0.705924	0.0353946		0.96318	0.0487127	0.1093		0.91329	0.0531645	0.2399		0.994196	0.0701172	0.0562
		6				0.695033	0.0360804		0.899522	0.0475529	0.2777		0.89591	0.057548	0.2666		1.06756	0.0761638	0.0061
		7				0.680449	0.0376322		0.946675	0.0650001	0.091		0.902048	0.061296	0.1875		0.988269	0.0720176	0.0354
		8				0.69717	0.0389051		0.997635	0.0836246	0.0423		0.925532	0.0603983	0.1657		1.02416	0.076542	0.0218
		9				0.694949	0.0434472		0.984461	0.0800001	0.0547		0.918127	0.0652494	0.1822		1.07612	0.0858297	0.0047
		10				0.709667	0.0380661		0.956123	0.0665236	0.135		0.912297	0.0630769	0.2592		1.08081	0.0881004	0.0064
		11				0.703172	0.0429762		1.00144	0.0816889	0.0446		0.928881	0.0698635	0.174		1.08123	0.0886177	0.0052
		12				0.700456	0.0414769		0.946395	0.0576423	0.1364		0.946233	0.0732497	0.118		1.11772	0.0862843	0.0015
		13				0.689739	0.0394685		1.00974	0.0825935	0.0261		0.945097	0.0762417	0.0967		1.11017	0.0997954	0.0013
		14				0.69841	0.0408015		0.974875	0.0824552	0.0731		0.941602	0.0720389	0.1243		1.15071	0.0973725	0.0004
		15				0.702828	0.0440972		0.977443	0.0629477	0.0761		0.95498	0.0787885	0.1034		1.12415	0.088974	0.0013
		16				0.714405	0.0433251		0.98259	0.0774355	0.0873		0.961237	0.0772487	0.1155		1.16251	0.107785	0.0005
		17				0.728452	0.0447804		0.995318	0.082042	0.0898		0.978279	0.0822213	0.1086		1.15704	0.095332	0.001
		18				0.693472	0.0456274		0.996026	0.0824421	0.0402		0.968837	0.0878659	0.062		1.17159	0.100893	0.0002
		19				0.710569	0.0469767		0.979882	0.0689442	0.0853		1.00808	0.0917038	0.0363		1.12453	0.0994298	0.0017
		20				0.717302	0.0462158		0.989308	0.0761283	0.0805		0.974095	0.0908745	0.0938		1.18214	0.0985108	0.0003
		21				0.706283	0.0465447		0.986802	0.0805838	0.0669		0.991223	0.0914886	0.0495		1.16076	0.0984284	0.0004
		22				0.708335	0.0463509		0.976994	0.0805778	0.0865		0.974675	0.0876389	0.0761		1.1982	0.10643	0.0001
		23				0.725606	0.0500331		1.01269	0.0856642	0.0578		0.991416	0.101072	0.077		1.19411	0.103882	0.0002
		24				0.724354	0.0490972		1.01645	0.0890456	0.0515		0.992685	0.0973234	0.0728		1.19057	0.0996313	0.0003
		25				0.71782	0.0480661		0.95031	0.0647879	0.1748		1.00495	0.104212	0.047		1.16938	0.106319	0.0004
		26				0.716386	0.0494768		0.974288	0.0849001	0.1079		0.994267	0.0950939	0.0585		1.20616	0.103648	0.0001
		27				0.703282	0.0521586		1.03871	0.0945833	0.0174		0.99606	0.0965577	0.0409		1.17019	0.109092	0.0003
		28				0.717607	0.0515503		1.03434	0.0984095	0.0284		0.980209	0.0973164	0.0827		1.23073	0.109028	<0.0001
		29				0.719377	0.0529292		1.01654	0.0889858	0.0458		0.98569	0.103375	0.0762		1.21875	0.108209	<0.0001
		30				0.71148	0.0499679		1.01534	0.096615	0.039		1.01271	0.103362	0.0331		1.21257	0.109335	<0.0001
		31				0.701079	0.0486338		0.991488	0.0785496	0.0535		1.02807	0.11148	0.0167		1.2109	0.113417	<0.0001
		32				0.704314	0.0515559		1.00719	0.0935783	0.0399		1.01522	0.105952	0.0257		1.2505	0.115042	<0.0001
		33				0.703064	0.0515988		0.99985	0.0888092	0.0462		1.03465	0.114767	0.0146		1.19721	0.0995714	<0.0001
		34				0.713181	0.0490278		0.99825	0.0854528	0.0605		1.0092	0.112443	0.0377		1.24322	0.117602	<0.0001
		35				0.697805	0.0497751		0.993219	0.0839003	0.0477		0.989511	0.0976279	0.042		1.2345	0.109577	<0.0001
		36				0.714032	0.0518122		1.00211	0.0842417	0.0565		0.988414	0.104792	0.0635		1.23187	0.108336	<0.0001
		37				0.692147	0.0490128		1.00065	0.0889423	0.0348		0.995003	0.101145	0.0317		1.17786	0.105036	0.0001
		38				0.711578	0.0531688		0.992887	0.0870435	0.0658		1.0052	0.103277	0.0401		1.21486	0.107737	<0.0001
		39				0.719275	0.0547087		1.03344	0.0936391	0.0303		1.00881	0.10834	0.0443		1.22921	0.110808	<0.0001
		40				0.696925	0.0500138		0.976774	0.0843759	0.0679		1.03647	0.112174	0.0117		1.21799	0.101204	<0.0001
		41				0.699857	0.0490569		1.01302	0.0839269	0.031		0.985917	0.106494	0.0482		1.24024	0.11504	<0.0001
		42				0.70938	0.0525998		0.998971	0.0792841	0.0546		1.01548	0.110684	0.0292		1.21531	0.108945	<0.0001
		43				0.686115	0.0486857		1.05461	0.104666	0.0069		0.9889	0.111044	0.0318		1.23583	0.113221	<0.0001
		44				0.693608	0.0531495		1.01117	0.0925022	0.0278		0.992732	0.106966	0.0349		1.2344	0.103626	<0.0001
		45				0.69887	0.0558915		0.955334	0.0781284	0.1111		0.993696	0.104732	0.0389		1.19247	0.109093	<0.0001
		46				0.70732	0.0518149		1.00656	0.0917905	0.0436		1.00252	0.108715	0.0385		1.23374	0.105932	<0.0001
		47				0.696044	0.0532134		1.02738	0.0985222	0.0195		1.03541	0.124988	0.0117		1.2356	0.107191	<0.0001
		48				0.695746	0.0511246		1.00768	0.0930398	0.032		1.00721	0.109651	0.0254		1.21909	0.10784	<0.0001
		49				0.69508	0.0500279		1.02505	0.0933682	0.0202		1.00251	0.115648	0.0282		1.18988	0.109852	<0.0001
		50				0.70007	0.0496856		1.0148	0.0894834	0.0299		0.990527	0.10873	0.0433		1.2248	0.113455	<0.0001

## Sheet: Fig 5J
Table 6: Quantification of the neurotransmitter release parameters of STX1-null neurons transduced either with STX1AWT, STX1AK260E, STX1ACVCV, or STX1AK260E+CVCV
Figure	Parameter measured	Statistical test	Genotype (STX1A)	Number of independent cultures	Number of observations	Parametric distribution 'Kolmogorov - Smirnov test'	Mean	SEM	Minimum	25% Percentile	Median	75% Percentile	Maximum	Mean ranks	Adjusted p-value (vs WT)
5J	Charge ratio of 250 mM / 500 mM (%)	Kruskal-Wallis; Dunn's post-hoc	WT	3	45	Yes	41.01	3.096	6.111	32.42	41.37	51.98	82.94	72.03
			K260E	3	48	No	30.71	3.022	1.741	22.29	27.9	37.94	74.43	50.33	0.1246
			CVCV	3	40	Yes	37.49	4.07	2.264	21.8	34.82	56.66	99.45	60.54	>0.9999
			K260E +CVCV	3	46	No	38.36	3.766	8.789	22.71	35.55	47.16	100	63.83	>0.9999
