# Supplementary material for: Syntaxin-1A modulates vesicle fusion in mammalian neurons via juxtamembrane domain dependent palmitoylation of its transmembrane domain
Source: eLife. 2022 May 31;11:e78182. doi: 10.7554/eLife.78182 (PMC9183232; doi:10.7554/eLife.78182)
Supplement: Figure 6—source data 1. [file elife-78182-fig6-data1.xlsx]

## Sheet: Fig 6C
Table 8: Quantification of the neurotransmitter release parameters of STX1-null neurons lentivirally transduced with STX1AWT or K260 mutants
Figure	Parameter measured	Statistical test	Genotype (STX1A)	Number of independent cultures	Number of observations	Parametric distribution 'Kolmogorov - Smirnov test'	Mean	SEM	Minimum	25% Percentile	Median	75% Percentile	Maximum	Mean ranks	Adjusted p-value (vs WT)
6C	EPSC Amplitude (nA)	Kruskal-Wallis; Dunn's post-hoc	WT	3	44	Yes	5.785	0.5689	0.2809	2.885	5.92	8.167	17.85	124
			K260E	3	45	No	3.326	0.4606	0.0812	0.9124	2.396	4.475	13.86	82	0.0113
			K260A	3	41	No	3.6	0.5384	0.008094	0.6615	2.558	6.448	11.73	84.9	0.0307
			K260Q	3	40	Yes	4.96	0.6114	0.08022	2.053	4.228	7.756	15.12	108.6	>0.9999
			K260R	3	40	Yes	6.198	0.6043	0.01451	3.397	5.815	8.326	14.67	129.6	>0.9999

## Sheet: Fig 6D
Table 8: Quantification of the neurotransmitter release parameters of STX1-null neurons lentivirally transduced with STX1AWT or K260 mutants
Figure	Parameter measured	Statistical test	Genotype (STX1A)	Number of independent cultures	Number of observations	Parametric distribution 'Kolmogorov - Smirnov test'	Mean	SEM	Minimum	25% Percentile	Median	75% Percentile	Maximum	Mean ranks	Adjusted p-value (vs WT)
6D	RRP charge (nC)	Kruskal-Wallis; Dunn's post-hoc	WT	3	44	No	0.6931	0.1159	0.01711	0.2542	0.412	0.9242	4.178	118.8
			K260E	3	45	Yes	0.3201	0.04276	0.04919	0.162	0.2539	0.3699	1.327	78.4	0.0158
			K260A	3	41	No	0.3307	0.03899	0	0.1119	0.2785	0.5407	0.8227	83.56	0.0615
			K260Q	3	40	Yes	0.4236	0.0542	0.0322	0.1823	0.3485	0.5988	1.654	96.68	0.8762
			K260R	3	40	No	0.7086	0.1079	0.07404	0.3908	0.5182	0.8228	3.785	131	>0.9999

## Sheet: Fig 6E
Table 8: Quantification of the neurotransmitter release parameters of STX1-null neurons lentivirally transduced with STX1AWT or K260 mutants
Figure	Parameter measured	Statistical test	Genotype (STX1A)	Number of independent cultures	Number of observations	Parametric distribution 'Kolmogorov - Smirnov test'	Mean	SEM	Minimum	25% Percentile	Median	75% Percentile	Maximum	Mean ranks	Adjusted p-value (vs WT)
6E	Pvr (%)	Kruskal-Wallis; Dunn's post-hoc	WT	3	44	No	7.574	1.199	0.517	3.465	4.947	8.96	42.11	102.1
			K260E	3	45	Yes	5.896	0.6782	0	2.421	5.687	7.788	19.95	95.35	>0.9999
			K260A	3	41	Yes	5.805	0.5341	0.443	3.073	5.24	7.582	15	97.24	>0.9999
			K260Q	3	40	No	6.757	0.7354	0.542	3.706	5.583	8.158	23.23	105	>0.9999
			K260R	3	40	Yes	6.139	0.626	0	3.697	5.657	7.436	20.57	103.1	>0.9999

## Sheet: Fig 6F
Table 8: Quantification of the neurotransmitter release parameters of STX1-null neurons lentivirally transduced with STX1AWT or K260 mutants
Figure	Parameter measured	Statistical test	Genotype (STX1A)	Number of independent cultures	Number of observations	Parametric distribution 'Kolmogorov - Smirnov test'	Mean	SEM	Minimum	25% Percentile	Median	75% Percentile	Maximum	Mean ranks	Adjusted p-value (vs WT)
6F	mEPSC frequency (Hz)	Kruskal-Wallis; Dunn's post-hoc	WT	3	40	No	5.214	0.7172	0	1.343	3.95	8.458	15.92	127.2
			K260E	3	41	No	0.4334	0.1464	0	0	0	0.51	4.19	49.5	<0.0001
			K260A	3	39	No	1.75	0.4855	0	0	0.35	2.75	12.33	74.63	0.0002
			K260Q	3	38	No	2.895	0.5055	0	0.0975	1.97	4.118	10.21	99.41	0.2557
			K260R	3	34	Yes	6.81	0.9281	0	2.213	6.08	9.473	19.35	138.9	>0.9999
