# Supplementary material for: Syntaxin-1A modulates vesicle fusion in mammalian neurons via juxtamembrane domain dependent palmitoylation of its transmembrane domain
Source: eLife. 2022 May 31;11:e78182. doi: 10.7554/eLife.78182 (PMC9183232; doi:10.7554/eLife.78182)
Supplement: Figure 7—source data 1. [file elife-78182-fig7-data1.xlsx]

## Sheet: Fig 7D
Table 9: Quantification of the neurotransmitter release parameters of STX1-null neurons lentivirally transduced with STX1AWT or with STX3B WT or E259K mutant
Figure	Parameter measured	Statistical test	Genotype	Number of independent cultures	Number of observations	Parametric distribution 'Kolmogorov - Smirnov test'	Mean	SEM	Minimum	25% Percentile	Median	75% Percentile	Maximum	Mean ranks	Adjusted p-value (vs STX1A WT)	Adjusted p-value (vs STX3B WT)
7D	STX3 / Bassoon (%; norm. to STX3B WT)	Kruskal-Wallis; Dunn's post-hoc	STX1A WT	4	60	No	10.53	0.6692	2.758	6.287	9.257	14.07	23.62	30.65		<0.0001
			STX3B WT	4	60	No	81.64	4.308	17.05	54.31	73.65	110.2	150.2	113.6	<0.0001
			STX3B E259K	4	60	No	100	5.976	22.95	67.97	89.57	121.2	229.9	127.3	<0.0001	0.448

## Sheet: Fig 7E
Table 9: Quantification of the neurotransmitter release parameters of STX1-null neurons lentivirally transduced with STX1AWT or with STX3B WT or E259K mutant
Figure	Parameter measured	Statistical test	Genotype	Number of independent cultures	Number of observations	Parametric distribution 'Kolmogorov - Smirnov test'	Mean	SEM	Minimum	25% Percentile	Median	75% Percentile	Maximum	Mean ranks	Adjusted p-value (vs STX1A WT)	Adjusted p-value (vs STX3B WT)
7E	EPSC Amplitude (nA)	Kruskal-Wallis; Dunn's post-hoc	STX1A WT	4	46	Yes	5.544	0.535	0.1352	2.783	5.024	8.145	14.3	96.48		<0.0001
			STX3B WT	4	40	No	0.329	0.1085	0	0	0.05412	0.2294	2.474	26.83	<0.0001
			STX3B E259K	4	52	No	4.094	0.6157	0	0.8941	2.926	4.915	19.61	78.46	0.0774	<0.0001

## Sheet: Fig 7F
Table 9: Quantification of the neurotransmitter release parameters of STX1-null neurons lentivirally transduced with STX1AWT or with STX3B WT or E259K mutant
Figure	Parameter measured	Statistical test	Genotype	Number of independent cultures	Number of observations	Parametric distribution 'Kolmogorov - Smirnov test'	Mean	SEM	Minimum	25% Percentile	Median	75% Percentile	Maximum	Mean ranks	Adjusted p-value (vs STX1A WT)
7F	EPSC decay time (80% - 20%; ms)	Mann-Whitney	STX1A WT	4	48	No	6.509	0.3247	3.288	4.895	6.045	7.62	12.42	50.98
			STX3B E259K	4	46	No	5.935	0.3021	3.208	4.247	5.476	7.166	11.78	43.87	0.209

## Sheet: Fig 7G
Table 9: Quantification of the neurotransmitter release parameters of STX1-null neurons lentivirally transduced with STX1AWT or with STX3B WT or E259K mutant
Figure	Parameter measured	Statistical test	Genotype	Number of independent cultures	Number of observations	Parametric distribution 'Kolmogorov - Smirnov test'	Mean	SEM	Minimum	25% Percentile	Median	75% Percentile	Maximum	Mean ranks	Adjusted p-value (vs STX1A WT)	Adjusted p-value (vs STX3B WT)
7G	RRP charge (nC)	Kruskal-Wallis; Dunn's post-hoc	STX1A WT	4	48	No	0.5315	0.06367	0.001296	0.243	0.4491	0.7023	2.394	96.35		<0.0001
			STX3B WT	4	34	No	0.0587	0.01817	0	0.0002738	0.01774	0.04819	0.4393	29.53	<0.0001
			STX3B E259K	4	49	No	0.1796	0.02531	0.002689	0.06025	0.1129	0.2542	0.8676	61.57	<0.0001	0.0005

## Sheet: Fig 7H
Table 9: Quantification of the neurotransmitter release parameters of STX1-null neurons lentivirally transduced with STX1AWT or with STX3B WT or E259K mutant
Figure	Parameter measured	Statistical test	Genotype	Number of independent cultures	Number of observations	Parametric distribution 'Kolmogorov - Smirnov test'	Mean	SEM	Minimum	25% Percentile	Median	75% Percentile	Maximum	Mean ranks	Adjusted p-value (vs STX1A WT)
7H	Pvr (%)	Mann-Whitney	STX1A WT	4	47	No	7.369	0.6884	1.202	4.22	5.957	9.316	20.82	38.06
			STX3B E259K	4	48	No	12.96	1.277	0	6.642	10.71	19.04	36.78	57.73	0.0004

## Sheet: Fig 7I
Table 9: Quantification of the neurotransmitter release parameters of STX1-null neurons lentivirally transduced with STX1AWT or with STX3B WT or E259K mutant
Figure	Parameter measured	Statistical test	Genotype	Number of independent cultures	Number of observations	Parametric distribution 'Kolmogorov - Smirnov test'	Mean	SEM	Minimum	25% Percentile	Median	75% Percentile	Maximum	Mean ranks	Adjusted p-value (vs STX1A WT)	Adjusted p-value (vs STX3B WT)
7I	mEPSC frequency (Hz)	Kruskal-Wallis; Dunn's post-hoc	STX1A WT	3	36	No	5.271	0.716	0	2.005	4.355	7.855	16.6	66.56		<0.0001
			STX3B WT	3	32	No	0.2419	0.07039	0	0	0	0.4925	1.5	22.09	<0.0001
			STX3B E259K	3	39	No	8.023	1.369	0	1.4	5	13.98	28.79	68.59	>0.9999	<0.0001
