# Supplementary material for: Syntaxin-1A modulates vesicle fusion in mammalian neurons via juxtamembrane domain dependent palmitoylation of its transmembrane domain
Source: eLife. 2022 May 31;11:e78182. doi: 10.7554/eLife.78182 (PMC9183232; doi:10.7554/eLife.78182)
Supplement: Figure 8—figure supplement 1—source data 1. [file elife-78182-fig8-figsupp1-data1.xlsx]

## Sheet: Figure 8 - supplement 1B
Table 11: Quantification of the neurotransmitter release parameters of STX3A and STX3B neurons as normalized to the values recorded from STX1AWT neurons
Figure	Parameter measured	Statistical test	Genotype (STX1A)	Number of independent cultures	Number of observations	Parametric distribution 'Kolmogorov - Smirnov test'	Mean	SEM	Minimum	25% Percentile	Median	75% Percentile	Maximum	Mean ranks	Adjusted p-value (vs STX1AWT)	Adjusted p-value (vs STX3BE259K)
Figure 8 -supplement 1B	mEPSC frequency (norm to STX1A WT)	Kruskal-Wallis; Dunn's post-hoc	STX1A WT	6	71	No	1	0.09906	0	0.2529	0.7691	1.719	2.84	79.6		>0.9999
			STX3B E259K	3	39	No	1.742	0.3497	0	0.2735	0.9229	2.101	8.716	95.31	>0.9999
		Mann-Whitney	STX3A WT	3	30	No	1.521	0.3595	0	0.06723	0.5261	2.87	6.95	85.47	>0.9999	>0.9999
			STX3A LINK+CC	3	36	Yes	2.856	0.2875	0	1.682	2.99	4.292	5.889	138.3	<0.0001	0.0243
			STX3A LINK+TMD	3	36	Yes	3.554	0.3104	0.05011	2.184	3.894	5.065	7.484	157.4	<0.0001	0.0001
