# Supplementary material for: Syntaxin-1A modulates vesicle fusion in mammalian neurons via juxtamembrane domain dependent palmitoylation of its transmembrane domain
Source: eLife. 2022 May 31;11:e78182. doi: 10.7554/eLife.78182 (PMC9183232; doi:10.7554/eLife.78182)
Supplement: Figure 8—source data 1. [file elife-78182-fig8-data1.xlsx]

## Sheet: Fig 8E
Table 10: Quantification of the neurotransmitter release parameters of STX1-null neurons lentivirally transduced with STX1AWT or with STX3A WT or mutants
Figure	Parameter measured	Statistical test	Genotype	Number of independent cultures	Number of observations	Parametric distribution 'Kolmogorov - Smirnov test'	Mean	SEM	Minimum	25% Percentile	Median	75% Percentile	Maximum	Adjusted p-value (vs STX1A WT)	Adjusted p-value (vs STX3A WT)
8E	STX3 / Bassoon (%; norm. to STX3A WT)	One-Way ANOVA	STX1A WT	2	30	Yes	3.771	0.1853	1.718	3.001	3.684	4.209	6.145		<0.0001
			STX3A WT	2	30	Yes	99.99	6.482	49.25	76.99	92.98	128.2	203.7	<0.0001
			STX3A CC	2	30	Yes	109.6	7.64	39.14	67.9	113.6	136.2	187.6	<0.0001	0.9344
			STX3A LINK	2	30	Yes	112	9.03	49.54	69.49	101.2	137.6	234.7	<0.0001	0.9344
			STX3A LINK+CC	2	30	Yes	111	8.83	25.49	71.54	113.2	130.5	261.7	<0.0001	0.9344
			STX3A LINK+TMD	2	30	Yes	121	9.09	58.01	78.81	109.9	153.9	234.7	<0.0001	0.4045

## Sheet: Fig 8F
Table 10: Quantification of the neurotransmitter release parameters of STX1-null neurons lentivirally transduced with STX1AWT or with STX3A WT or mutants
Figure	Parameter measured	Statistical test	Genotype	Number of independent cultures	Number of observations	Parametric distribution 'Kolmogorov - Smirnov test'	Mean	SEM	Minimum	25% Percentile	Median	75% Percentile	Maximum	Mean ranks	Adjusted p-value (vs STX1A WT)	Adjusted p-value (vs STX3A WT)
8F	EPSC Amplitude (nA)	Kruskal-Wallis; Dunn's post-hoc	STX1A WT	3	38	No	4.416	0.643	0.174	1.25	3.773	6.195	16.29	177		<0.0001
			STX3A WT	3	40	No	0.7467	0.1562	0	0.1193	0.3636	1.03	3.774	80.3	<0.0001
			STX3A CC	3	37	No	0.4609	0.09526	0	0.05611	0.289	0.6043	2.591	65.7	<0.0001	>0.9999
			STX3A LINK	3	38	No	1.145	0.2071	0	0.2302	0.5667	1.597	4.455	100.8	<0.0001	>0.9999
			STX3A LINK+CC	3	38	Yes	1.908	0.2421	0.02127	0.6408	1.543	2.876	5.664	139.1	0.2091	0.0016
			STX3A LINK+TMD	3	41	Yes	1.603	0.1638	0	0.7818	1.506	2.309	4.072	135.2	0.085	0.0035

## Sheet: Fig 8G
Table 10: Quantification of the neurotransmitter release parameters of STX1-null neurons lentivirally transduced with STX1AWT or with STX3A WT or mutants
Figure	Parameter measured	Statistical test	Genotype	Number of independent cultures	Number of observations	Parametric distribution 'Kolmogorov - Smirnov test'	Mean	SEM	Minimum	25% Percentile	Median	75% Percentile	Maximum	Mean ranks	Adjusted p-value (vs STX1A WT)	Adjusted p-value (vs STX3A WT)
8G	EPSC rise time (20% - 80%; ms)	Kruskal-Wallis; Dunn's post-hoc	STX1A WT	3	38	No	0.9639	0.06085	0.5148	0.6807	0.8105	1.189	2.095	50.16		<0.0001
			STX3A WT	3	35	Yes	2.204	0.1344	0.4873	1.668	2.151	2.484	4.033	153.9	<0.0001
			STX3A CC	3	25	No	2.157	0.149	1.118	1.637	2.106	2.411	4.629	154.2	<0.0001	>0.9999
			STX3A LINK	3	31	No	1.717	0.104	0.9118	1.348	1.502	2.164	3.243	124.3	<0.0001	0.6209
			STX3A LINK+CC	3	35	No	1.487	0.07829	0.8834	1.248	1.403	1.613	3.536	106.6	0.0006	0.0113
			STX3A LINK+TMD	3	39	Yes	0.9617	0.04869	0.5063	0.7578	0.9426	1.183	1.794	50.67	>0.9999	<0.0001

## Sheet: Fig 8H
Table 10: Quantification of the neurotransmitter release parameters of STX1-null neurons lentivirally transduced with STX1AWT or with STX3A WT or mutants
Figure	Parameter measured	Statistical test	Genotype	Number of independent cultures	Number of observations	Parametric distribution 'Kolmogorov - Smirnov test'	Mean	SEM	Minimum	25% Percentile	Median	75% Percentile	Maximum	Mean ranks	Adjusted p-value (vs STX1A WT)	Adjusted p-value (vs STX3A WT)
8H	EPSC decay time (80% - 20%; ms)	Kruskal-Wallis; Dunn's post-hoc	STX1A WT	3	38	Yes	6.522	0.2998	3.723	5.09	6.35	7.199	11.06	57.26		<0.0001
			STX3A WT	3	34	Yes	12.23	0.6444	5.325	9.3	11.99	15.62	18.51	146.2	<0.0001
			STX3A CC	3	25	Yes	12.35	0.7965	5.255	9.465	12.57	14.96	21.29	147.4	<0.0001	>0.9999
			STX3A LINK	3	31	Yes	10.84	0.5737	5.692	9.002	10.48	12.34	19.88	132.1	<0.0001	>0.9999
			STX3A LINK+CC	3	35	Yes	9.007	0.4117	4.804	7.442	8.539	10.38	16.56	105.2	0.0074	0.0564
			STX3A LINK+TMD	3	40	No	6.338	0.3742	2.994	4.53	5.637	7.545	13.07	52.39	>0.9999	<0.0001

## Sheet: Fig 8I
Table 10: Quantification of the neurotransmitter release parameters of STX1-null neurons lentivirally transduced with STX1AWT or with STX3A WT or mutants
Figure	Parameter measured	Statistical test	Genotype	Number of independent cultures	Number of observations	Parametric distribution 'Kolmogorov - Smirnov test'	Mean	SEM	Minimum	25% Percentile	Median	75% Percentile	Maximum	Mean ranks	Adjusted p-value (vs STX1A WT)	Adjusted p-value (vs STX3A WT)
8I	RRP charge (nC)	Kruskal-Wallis; Dunn's post-hoc	STX1A WT	3	38	No	0.4003	0.05546	0.03595	0.1832	0.3007	0.5129	1.538	186.4		<0.0001
			STX3A WT	3	32	No	0.03987	0.006199	0	0.01802	0.03247	0.04521	0.1425	70.36	<0.0001
			STX3A CC	3	37	Yes	0.04386	0.008191	0	0.01158	0.03086	0.05461	0.2244	69.99	<0.0001	>0.9999
			STX3A LINK	3	35	No	0.08232	0.01421	0	0.01768	0.06445	0.1025	0.3405	101.8	<0.0001	>0.9999
			STX3A LINK+CC	3	36	No	0.1059	0.01214	0	0.05519	0.09473	0.1583	0.2573	124.4	0.0074	0.0564
			STX3A LINK+TMD	3	42	No	0.07329	0.00937	0	0.03397	0.05529	0.1051	0.2546	101.8	>0.9999	<0.0001

## Sheet: Fig 8J
Table 10: Quantification of the neurotransmitter release parameters of STX1-null neurons lentivirally transduced with STX1AWT or with STX3A WT or mutants
Figure	Parameter measured	Statistical test	Genotype	Number of independent cultures	Number of observations	Parametric distribution 'Kolmogorov - Smirnov test'	Mean	SEM	Minimum	25% Percentile	Median	75% Percentile	Maximum	Mean ranks	Adjusted p-value (vs STX1A WT)	Adjusted p-value (vs STX3A WT)
8J	Pvr (%)	Kruskal-Wallis; Dunn's post-hoc	STX1A WT	3	36	Yes	5.468	0.5852	0	2.785	5.149	7.804	11.83	58.78		0.0017
			STX3A WT	3	29	No	15.62	2.505	0	4.077	10.46	23.56	48.32	114.4	0.0017
			STX3A CC	3	32	Yes	11.2	1.703	0	2.158	8.229	17.89	32.55	98.91	0.0648	>0.9999
			STX3A LINK	3	33	Yes	13.05	1.534	0	4.646	12.42	18.31	32.68	115.3	0.0008	>0.9999
			STX3A LINK+CC	3	32	Yes	13.36	1.152	0.676	8.862	13.76	16.46	35.72	124.5	<0.0001	>0.9999
			STX3A LINK+TMD	3	38	Yes	9.708	0.8372	0	5.878	10.65	12.75	21.74	97.64	0.0583	>0.9999

## Sheet: Fig 8K
Table 10: Quantification of the neurotransmitter release parameters of STX1-null neurons lentivirally transduced with STX1AWT or with STX3A WT or mutants
Figure	Parameter measured	Statistical test	Genotype	Number of independent cultures	Number of observations	Parametric distribution 'Kolmogorov - Smirnov test'	Mean	SEM	Minimum	25% Percentile	Median	75% Percentile	Maximum	Mean ranks	Adjusted p-value (vs STX1A WT)	Adjusted p-value (vs STX3A WT)
8K	mEPSC (Hz)	Kruskal-Wallis; Dunn's post-hoc	STX1A WT	3	35	Yes	4.216	0.643	0	0.16	2.75	7.73	12.29	72.36		>0.9999
			STX3A WT	3	30	No	6.509	1.508	0	0.26	2.21	13.25	29.92	82.37	>0.9999
			STX3A CC	3	35	No	5.655	1.188	0	0.135	2.79	8.05	22.81	79.27	>0.9999	>0.9999
			STX3A LINK	3	33	No	8.916	1.47	0	1.65	4.48	18.13	27.79	103.4	0.4232	>0.9999
			STX3A LINK+CC	3	36	Yes	12	1.18	0	7.155	12.77	17.44	22.33	127.4	0.0014	0.0319
			STX3A LINK+TMD	3	36	No	14.76	1.227	0.19	8.283	17.09	20.45	28.38	146.9	<0.0001	0.0002
