# Supplementary material for: Syntaxin-1A modulates vesicle fusion in mammalian neurons via juxtamembrane domain dependent palmitoylation of its transmembrane domain
Source: eLife. 2022 May 31;11:e78182. doi: 10.7554/eLife.78182 (PMC9183232; doi:10.7554/eLife.78182)
Supplement: Figure 9—source data 1. [file elife-78182-fig9-data1.xlsx]

## Sheet: Fig 9C
Table 12: Quantification of the presynaptic Ca2+-influx in STX1-null neurons transduced either with STX1AWT, STX3B WT or mutant, or STX3A WT or mutants
Figure	Parameter measured	Statistical test	Genotype	Number of independent cultures	Number of observations	Parametric distribution 'Kolmogorov - Smirnov test'	Mean	SEM	Minimum	25% Percentile	Median	75% Percentile	Maximum	Mean ranks	Adjusted p-value (vs STX1A WT)	Adjusted p-value (vs STX3B WT)
9C	∆F/F0 1 AP	Kruskal-Wallis; Dunn's post-hoc	STX1A WT	3	35	No	0.1449	0.0734	0.01102	0.02386	0.03726	0.05218	2.306	55.51		>0.9999
			STX3B WT	3	35	No	0.07485	0.02913	0.002469	0.01606	0.03164	0.06281	1.031	48.57	>0.9999
			STX3B E259K	3	35	No	0.07689	0.03199	0.005696	0.02601	0.03876	0.05934	1.152	54.91	>0.9999	>0.9999
	∆F/F0 2 AP	Kruskal-Wallis; Dunn's post-hoc	STX1A WT	3	35	No	0.282	0.08484	0.02961	0.09267	0.1155	0.2119	2.621	58.74		0.2931
			STX3B WT	3	35	No	0.1643	0.0362	0.01374	0.05244	0.09774	0.2119	1.189	46.69	0.2931
			STX3B E259K	3	35	No	0.1692	0.03091	0.0175	0.07235	0.1326	0.1991	1.07	53.57	>0.9999	>0.9999
	∆F/F0 5 AP	Kruskal-Wallis; Dunn's post-hoc	STX1A WT	3	35	No	0.5539	0.08406	0.0872	0.2735	0.4234	0.6457	2.757	62.03		0.033
			STX3B WT	3	35	No	0.3615	0.0523	0.03375	0.1219	0.2707	0.5383	1.267	43.51	0.033
			STX3B E259K	3	35	Yes	0.4138	0.04697	0.06784	0.2062	0.3979	0.5163	1.28	53.46	0.7171	0.516
	∆F/F0 10 AP	Kruskal-Wallis; Dunn's post-hoc	STX1A WT	3	35	No	0.8084	0.09195	0.171	0.4197	0.7476	1.029	2.98	62.69		0.0093
			STX3B WT	3	35	No	0.5072	0.06742	0.057	0.2162	0.3766	0.6023	1.506	41.14	0.0093
			STX3B E259K	3	35	Yes	0.669	0.07484	0.08432	0.3783	0.5672	0.8723	1.901	55.17	0.906	0.1619
	∆F/F0 20 AP	Kruskal-Wallis; Dunn's post-hoc	STX1A WT	3	35	Yes	0.998	0.09935	0.2601	0.5128	0.9588	1.318	3.015	63.51		0.0038
			STX3B WT	3	35	No	0.6031	0.07918	0.08961	0.2907	0.4555	0.6373	1.979	40.03	0.0038
			STX3B E259K	3	35	Yes	0.8425	0.0909	0.134	0.4575	0.7412	1.162	2.322	55.46	0.8052	0.1022

## Sheet: Fig 9D
Table 12: Quantification of the presynaptic Ca2+-influx in STX1-null neurons transduced either with STX1AWT, STX3B WT or mutant, or STX3A WT or mutants
Figure	Parameter measured	Statistical test	Genotype	Number of independent cultures	Number of observations	Parametric distribution 'Kolmogorov - Smirnov test'	Mean	SEM	Minimum	25% Percentile	Median	75% Percentile	Maximum	Mean ranks	Adjusted p-value (vs STX1A WT)	Adjusted p-value (vs STX3A WT)
9D	∆F/F0 1 AP	Kruskal-Wallis; Dunn's post-hoc	STX1A WT	3	34	No	0.1541	0.07531	0.009042	0.03009	0.04318	0.08401	2.306	93.04		0.091
			STX3A WT	3	35	No	0.03877	0.008149	0.002705	0.01304	0.03158	0.04927	0.2928	68.31	0.091
			STX3A LINK+CC		39	No	0.04585	0.01019	0.002095	0.01303	0.02677	0.05211	0.3102	64.97	0.028	>0.9999
			STX3A LINK+TMD	3	38	No	0.03785	0.006083	0.005769	0.0191	0.02775	0.04587	0.2243	69.54	0.1113	>0.9999
	∆F/F0 2 AP	Kruskal-Wallis; Dunn's post-hoc	STX1A WT	3	34	No	0.3189	0.08808	0.02961	0.1052	0.146	0.2737	2.621	96.09		0.0103
			STX3A WT		35	No	0.1082	0.01519	0.0008948	0.04071	0.0879	0.1608	0.4629	64.17	0.0103
			STX3A LINK+CC	3	39	No	0.1434	0.03093	0.01463	0.04853	0.08208	0.1423	1.15	67.45	0.0234	>0.9999
			STX3A LINK+TMD	3	38	Yes	0.1117	0.01236	0.026	0.05037	0.09154	0.1435	0.3621	68.09	0.0303	>0.9999
	∆F/F0 5 AP	Kruskal-Wallis; Dunn's post-hoc	STX1A WT	3	34	No	0.5915	0.08638	0.0872	0.3078	0.441	0.668	2.757	95.35		0.0079
			STX3A WT		35	Yes	0.3187	0.03556	0.03349	0.1699	0.292	0.4364	0.9372	62.66	0.0079
			STX3A LINK+CC	3	39	No	0.3489	0.03499	0.05458	0.1847	0.2999	0.4773	0.9181	67.79	0.0329	>0.9999
			STX3A LINK+TMD	3	38	Yes	0.3528	0.03314	0.0883	0.1906	0.299	0.4539	0.8508	69.79	0.0627	>0.9999
	∆F/F0 10 AP	One-Way ANOVA	STX1A WT	3	34	Yes	0.9242	0.09799	0.171	0.5099	0.791	1.143	2.98			0.0003
			STX3A WT		35	Yes	0.5194	0.05488	0.0782	0.2852	0.4563	0.6685	1.426		0.0003
			STX3A LINK+CC	3	39	Yes	0.5679	0.04942	0.02737	0.3331	0.5105	0.8057	1.309		0.001	0.841
			STX3A LINK+TMD	3	38	Yes	0.6089	0.05639	0.1733	0.3203	0.5277	0.911	1.547		0.004	0.7101
	∆F/F0 20 AP	One-Way ANOVA	STX1A WT	3	34	Yes	1.117	0.09885	0.2601	0.6708	1.053	1.518	3.015			0.0002
			STX3A WT		35	Yes	0.6569	0.06402	0.1223	0.3889	0.56	0.915	1.833		0.0002
			STX3A LINK+CC	3	39	Yes	0.7047	0.05996	0.1843	0.378	0.6346	1.021	1.575		0.0007	0.703
			STX3A LINK+TMD	3	38	Yes	0.7813	0.07264	0.2411	0.3547	0.6703	1.12	1.949		0.0076	0.5582
