# Supplementary figures and images for: Syntaxin-1A modulates vesicle fusion in mammalian neurons via juxtamembrane domain dependent palmitoylation of its transmembrane domain
Source: eLife journal article supplement (doi:10.7554/elife.78182), 2022-05-31

Neuronal lysates  
(Figure 3A)

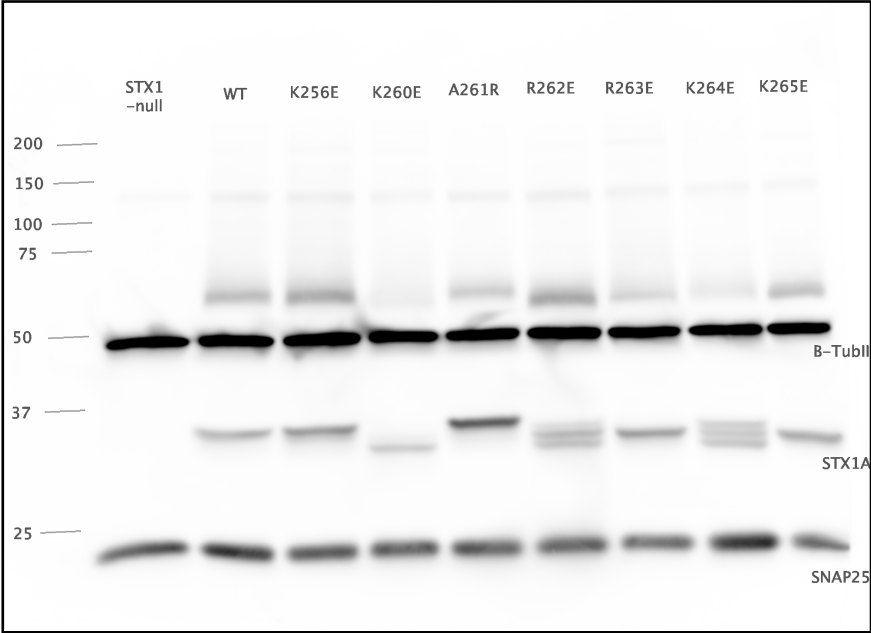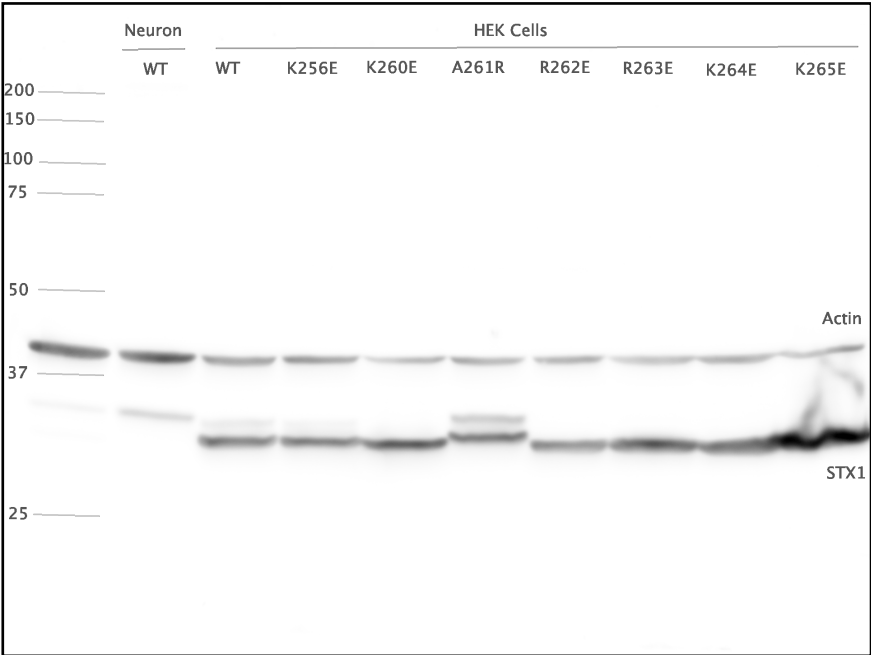

Figure 3 - Source Data 2 -  
whole blots

Supplement: fig3-data2 [file elife-78182-fig3-data2-v2.zip]

**Neuronal lysates**  
**(Figure 4B)**

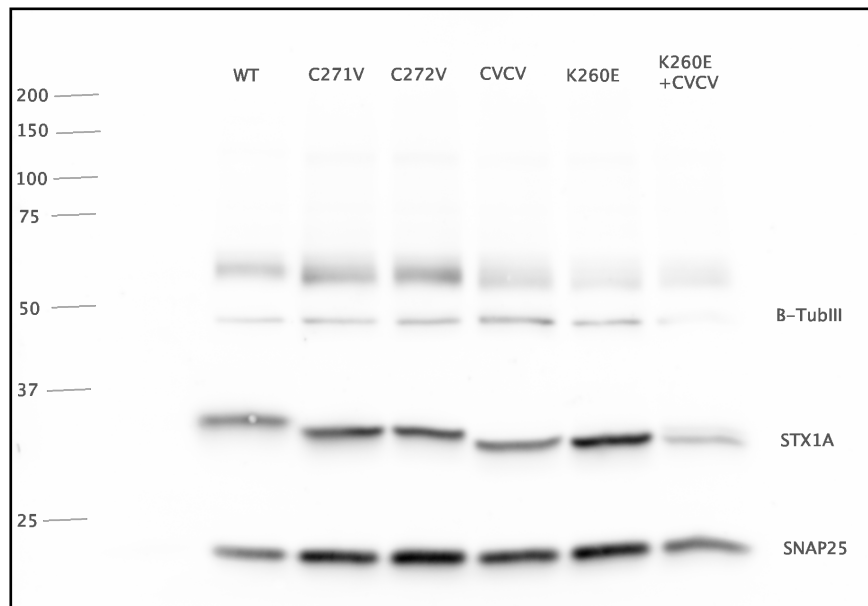

**Figure 4 - Source Data 2 -  
whole blot**

Supplement: fig4-data2 [file Figure 4B labeled whole blot.pdf › Figure 4 - Source Data 2/Figure 4B labeled whole blot.pdf]

Culture 1

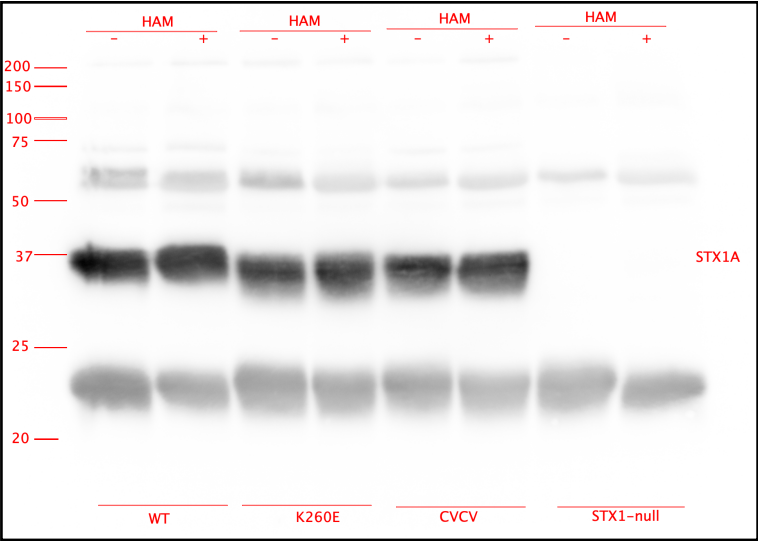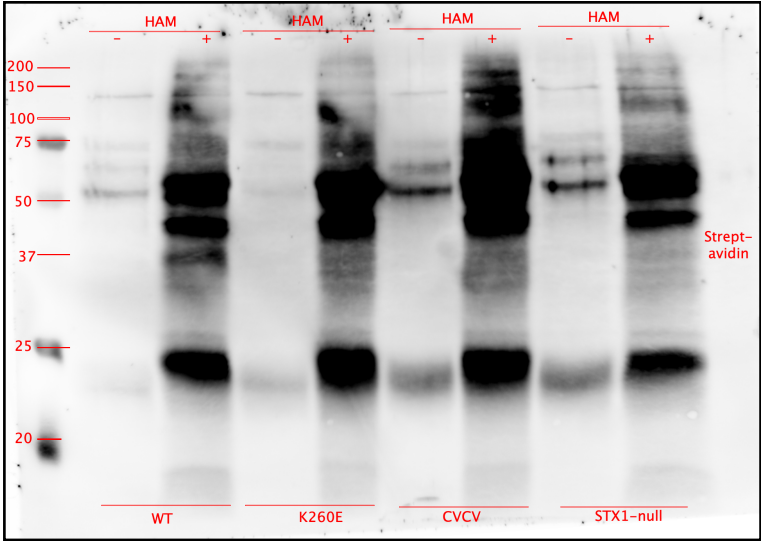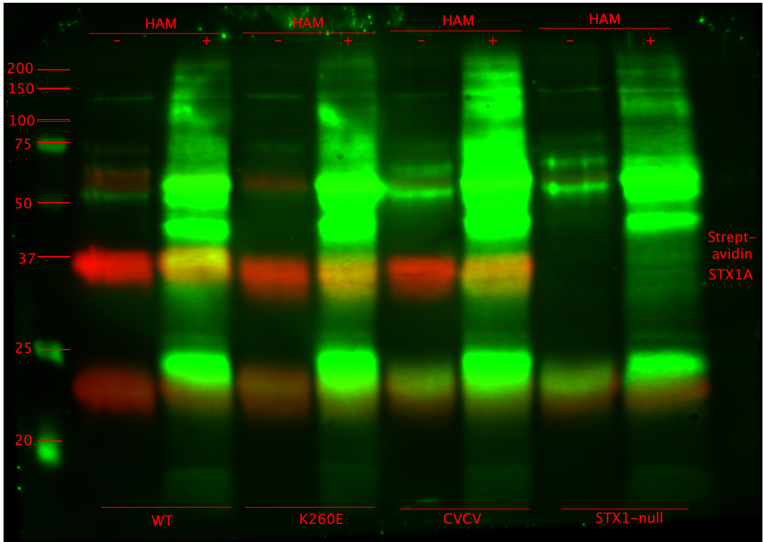

Supplement: fig4-data2 [file Figure 4D and Figure 4-Supplement 1- Culture 1- labeled whole blots.pdf › Figure 4 - Source Data 2/Figure 4D and Figure 4-Supplement 1- Culture 1- labeled whole blots.pdf]

Culture 2

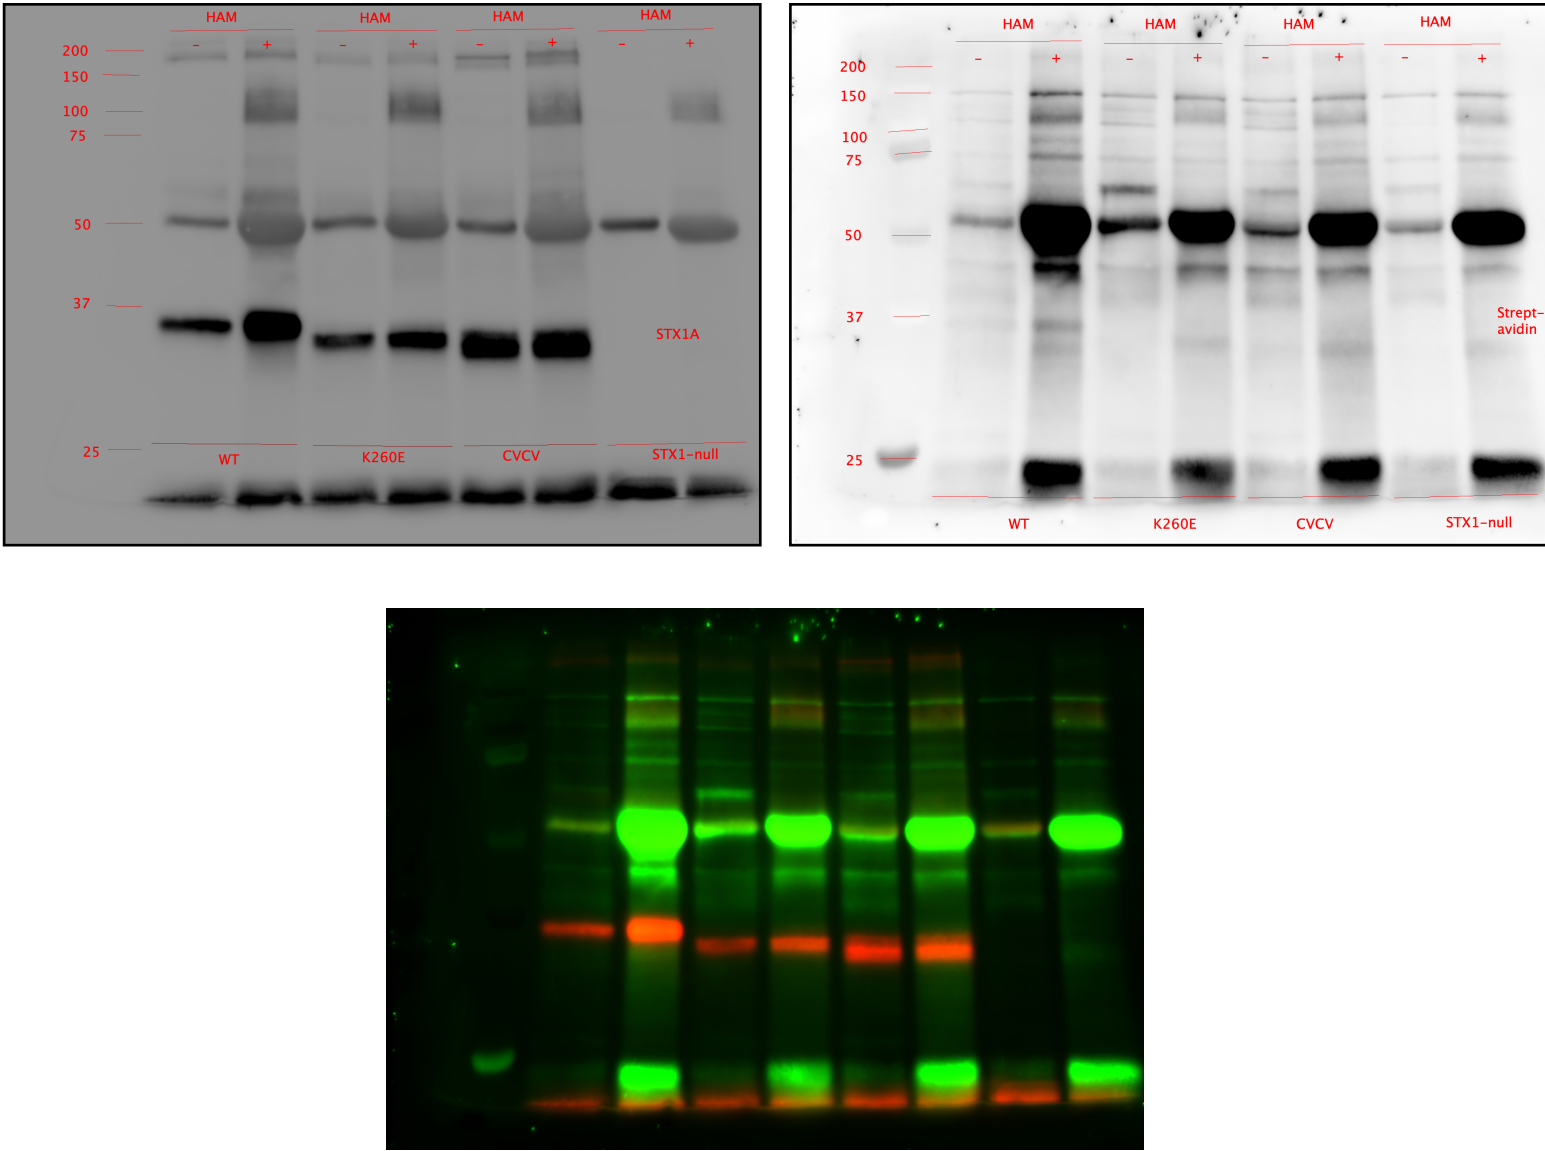

Figure 4 - Supplement 1 -  
Source Data 1 - whole blots

Supplement: fig4-figsupp1-data1 [file elife-78182-fig4-figsupp1-data1-v2.zip]

Neuronal lysates  
(Figure 6B)

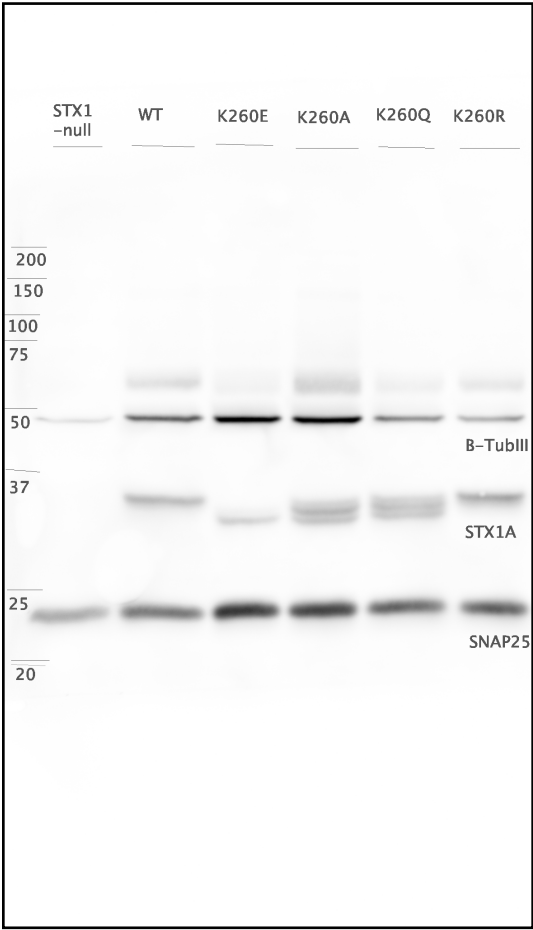

Figure 6 - Source Data 2 - whole blot

Supplement: fig6-data2 [file elife-78182-fig6-data2-v2.zip]

Neuronal lysates  
(Figure 7B)

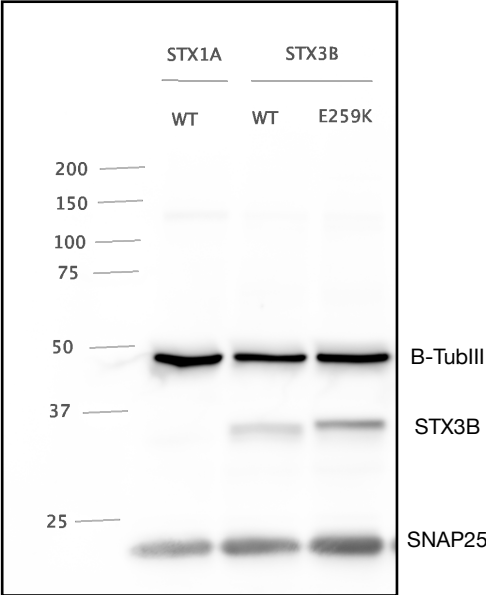

Figure 7 - Source Data 2 - whole blot

Supplement: fig7-data2 [file Figure7B labeled whole blot.pdf › Figure 7 - Source Data 2/Figure7B labeled whole blot.pdf]

Neuronal lysates  
(Figure 8B)

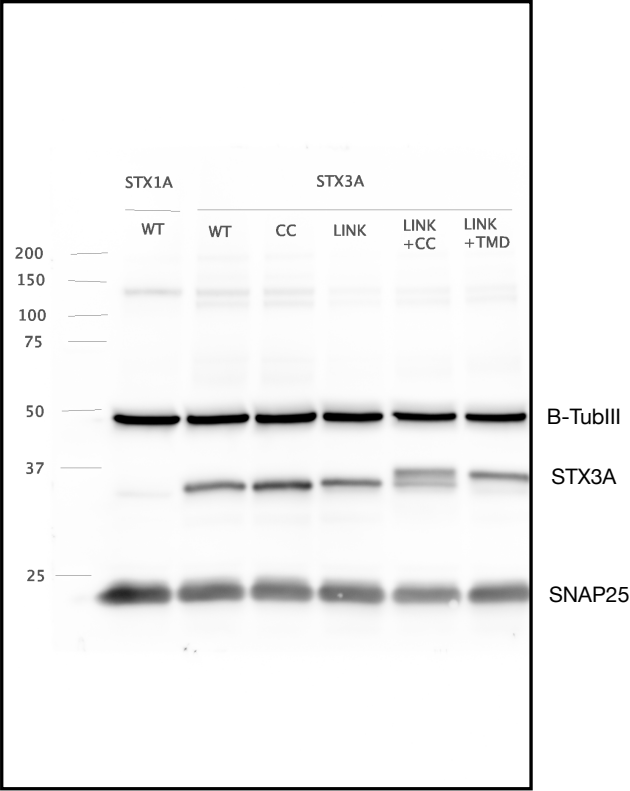

Figure 8 - Source Data 2 -  
whole blot

Supplement: fig8-data2 [file Figure 8B - Source data 2 - labeled whole blot.pdf › Figure 8 - Source Data 2/Figure 8B - Source data 2 - labeled whole blot.pdf]
